# Supplementary material
Source: PubMed Central journal article supplement (PMC6709686)

**Supplementary Data Set 5. UCSC genome browser screenshots of intronic RPs and their associated cryptic exons.** Shown are 50 examples of intronic RPs with high-scoring cryptic splice donors; the inferred cryptic exons are highlighted in red.

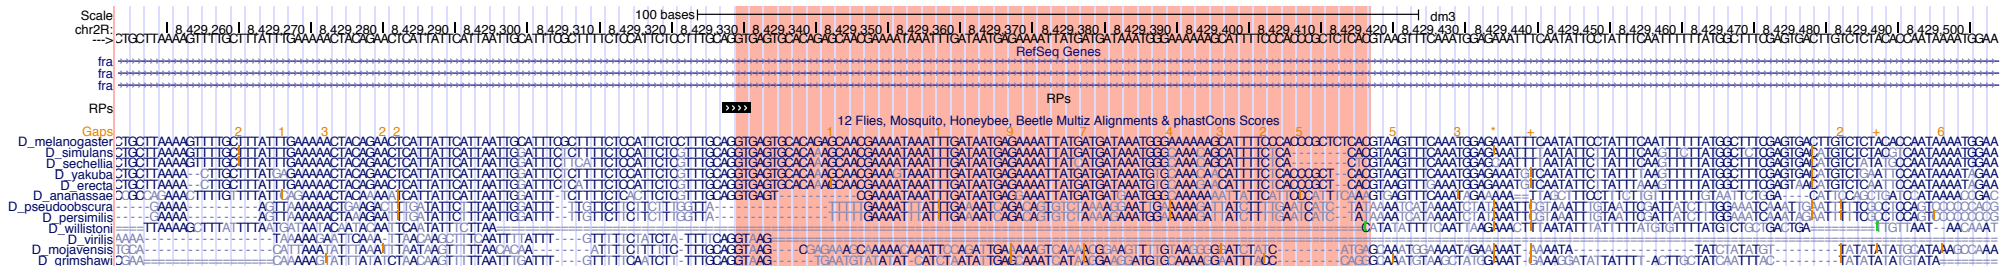

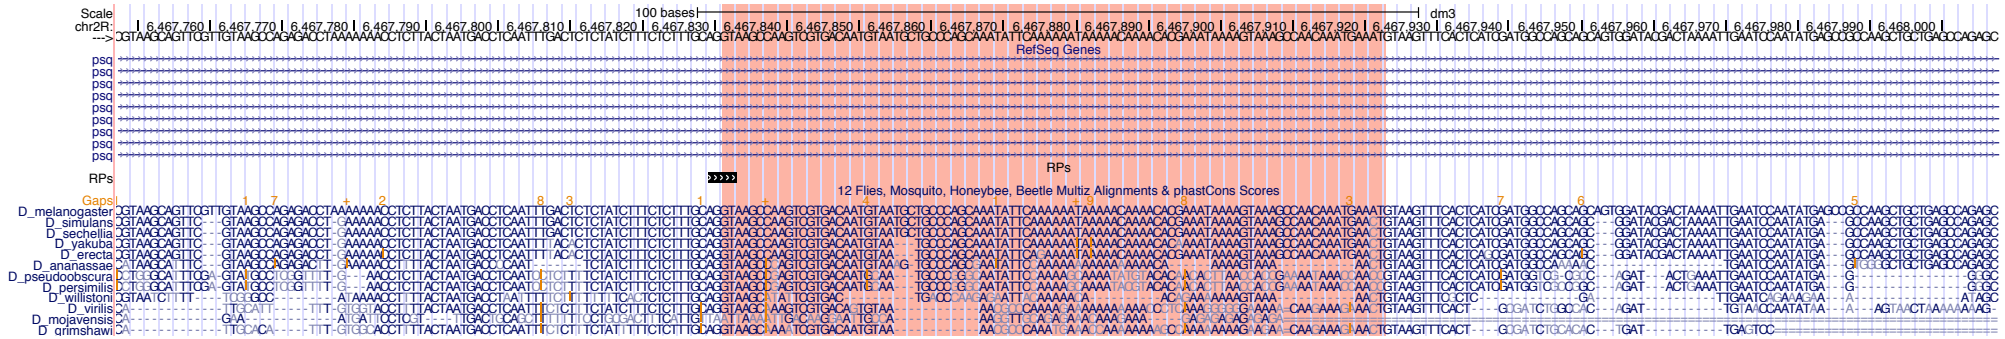

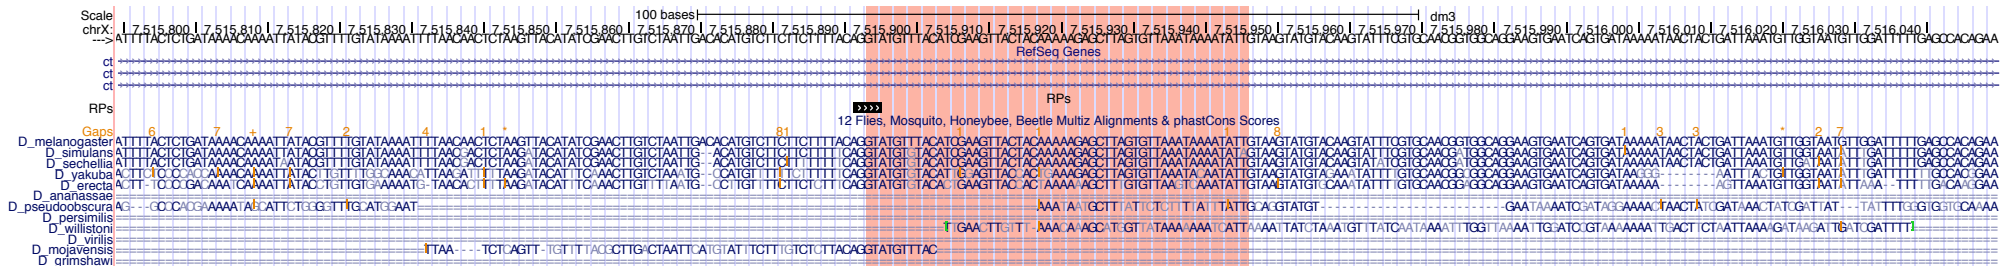





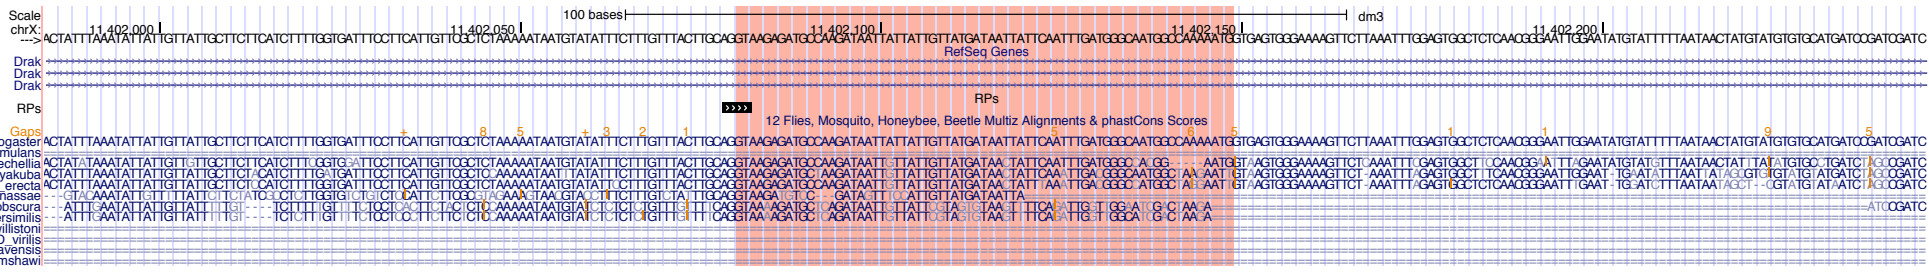

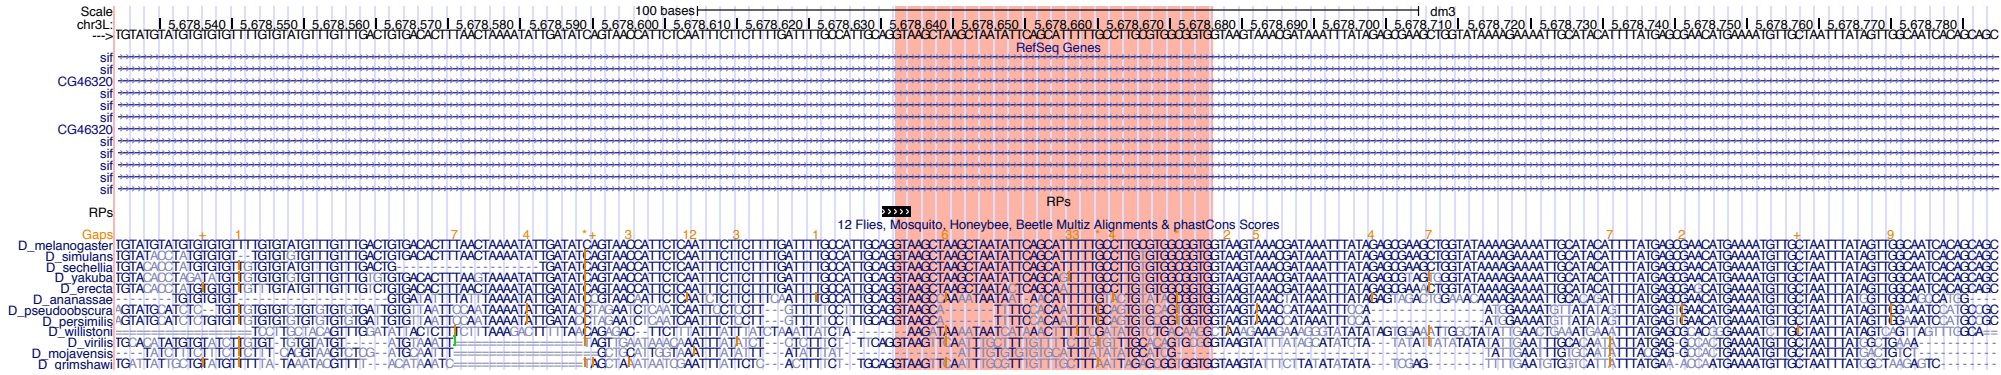



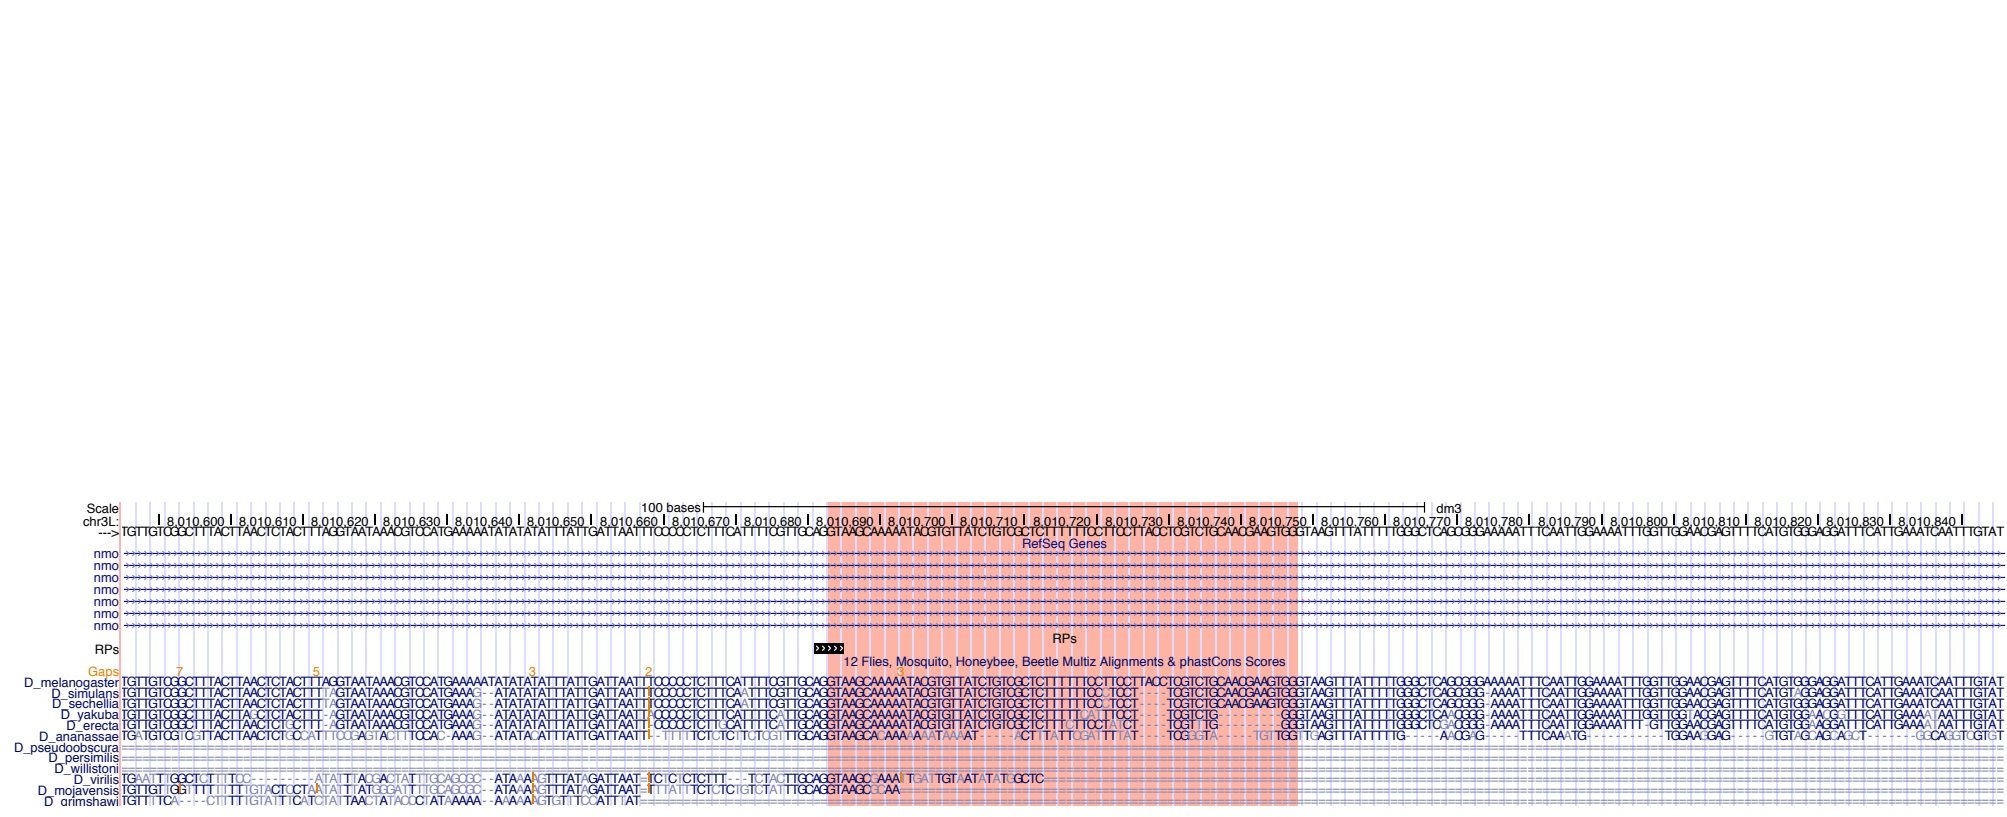



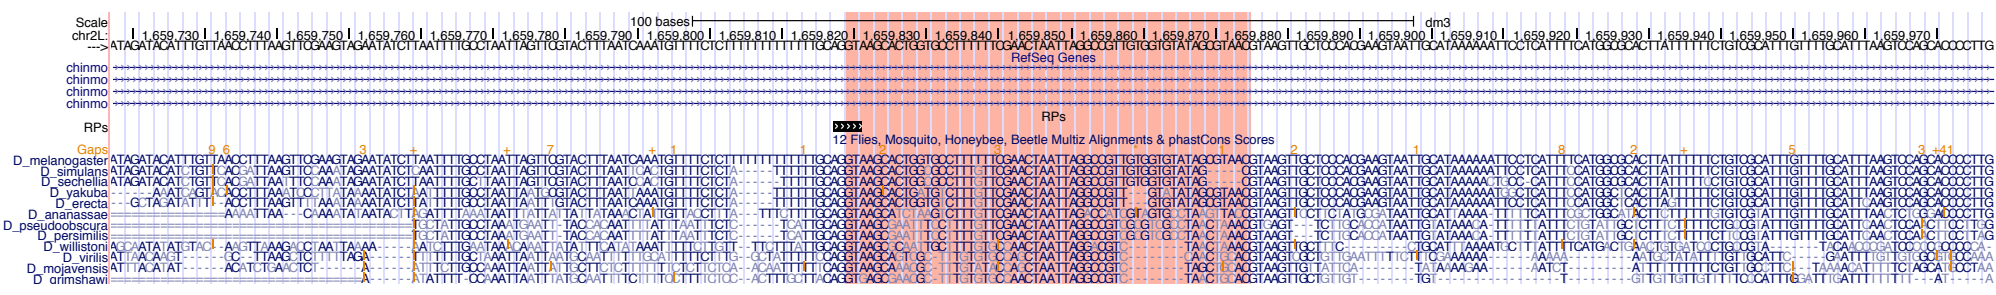

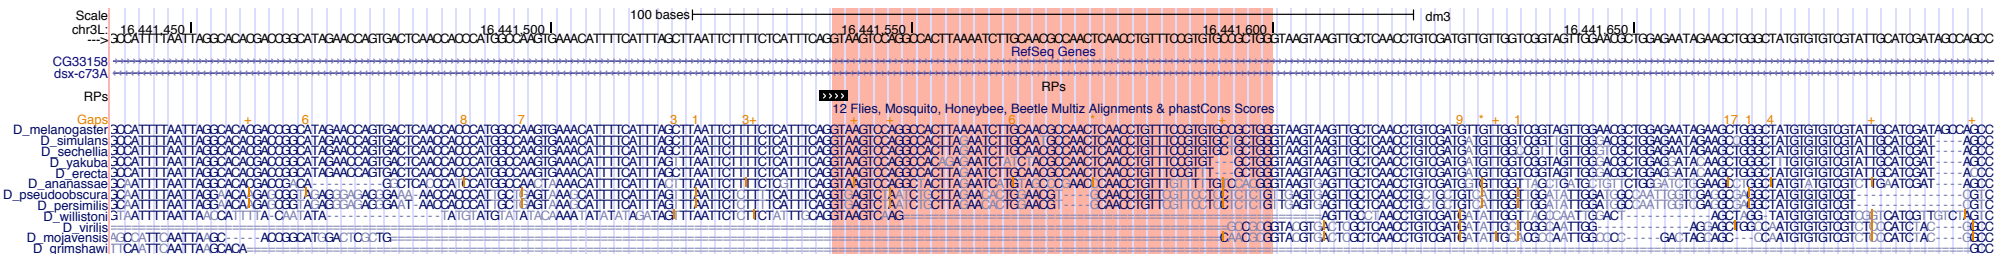

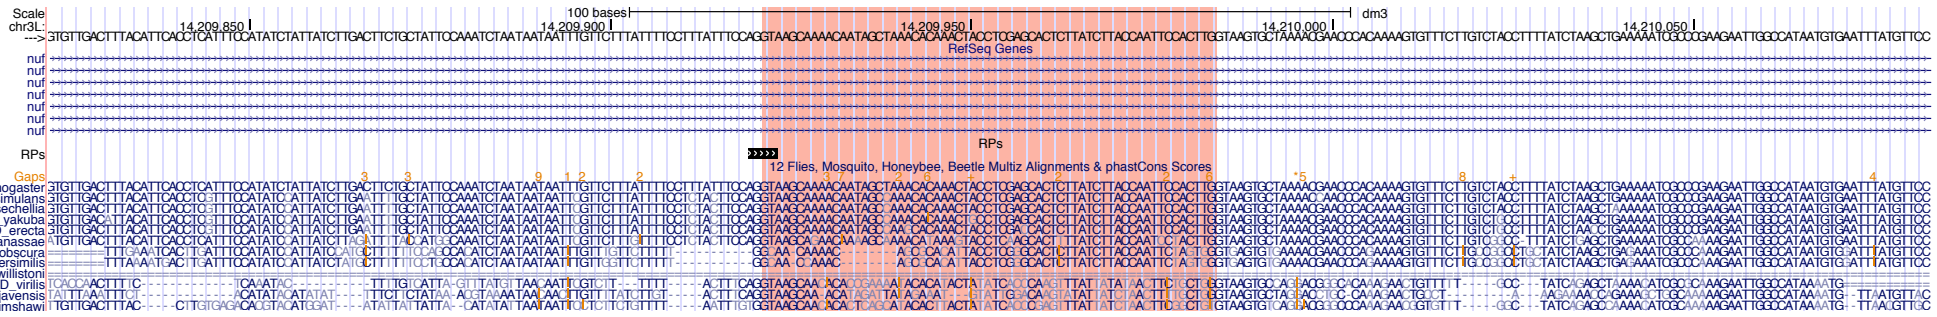

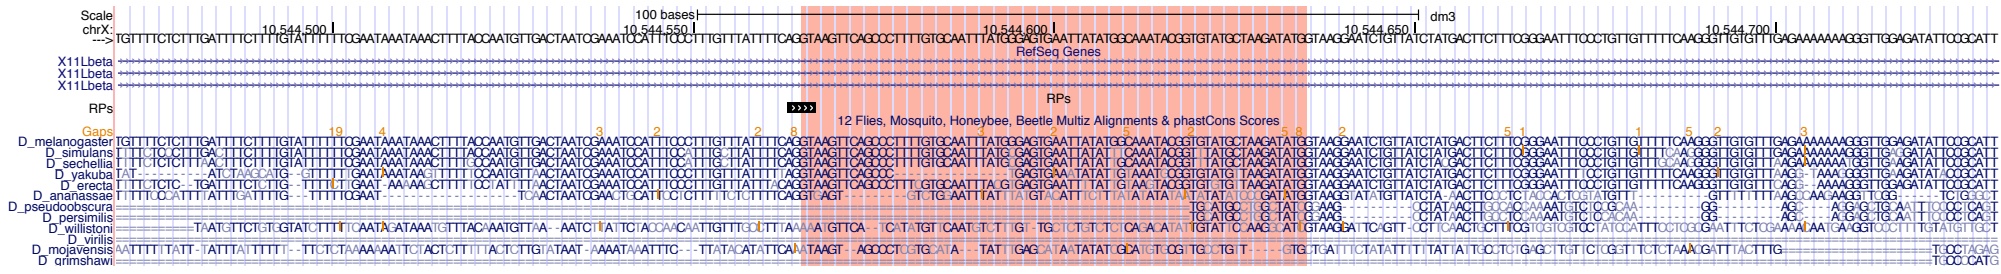

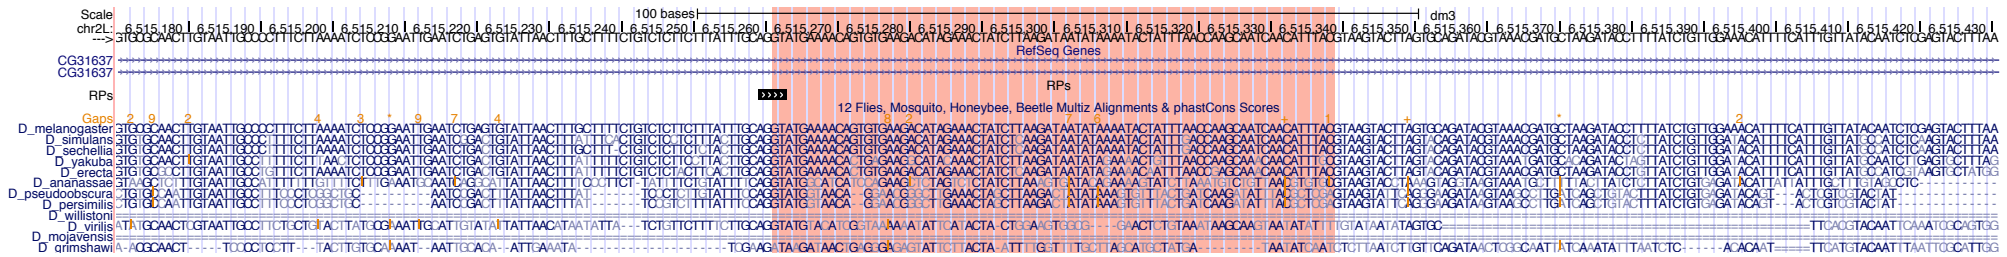

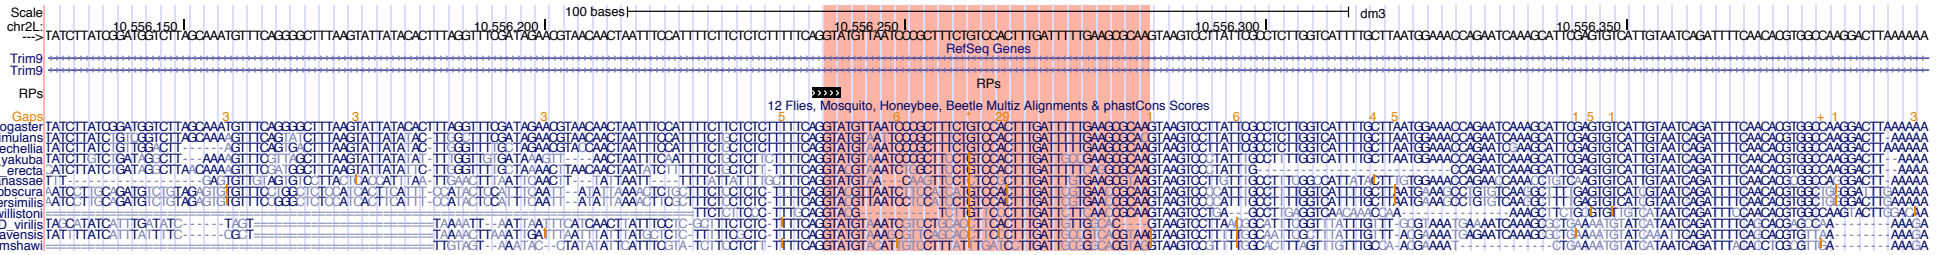



Scale chr3R: | 5,745,390 | 5,745,400 | 5,745,410 | 5,745,420 | 5,745,430 | 5,745,440 | 5,745,450 | 5,745,460 | 5,745,470 | 5,745,480 | 5,745,490 | 5,745,500 | 5,745,510 | 5,745,520 | 5,745,530 | 5,745,540 | 5,745,550 | 5,745,560 | 5,745,570 | 5,745,580 | 5,745,590 | 5,745,600 | 5,745,610 | 5,745,620 | 5,745,630 |

dm3  
RelSeq Genes  
Glut4EF  
Glut4EF  
Glut4EF  
Glut4EF

RP  
12 Files, Mosquito, Honeybee, Beetle Multiz Alignments & phastCons Scores  
D\_melanogaster  
D\_simulians  
D\_sechellia  
D\_yakuba  
D\_erecia  
D\_ananassae  
D\_pseudoobscura  
D\_persimilis  
D\_willistoni  
D\_virilis  
D\_mojavensis  
D\_grimshawi



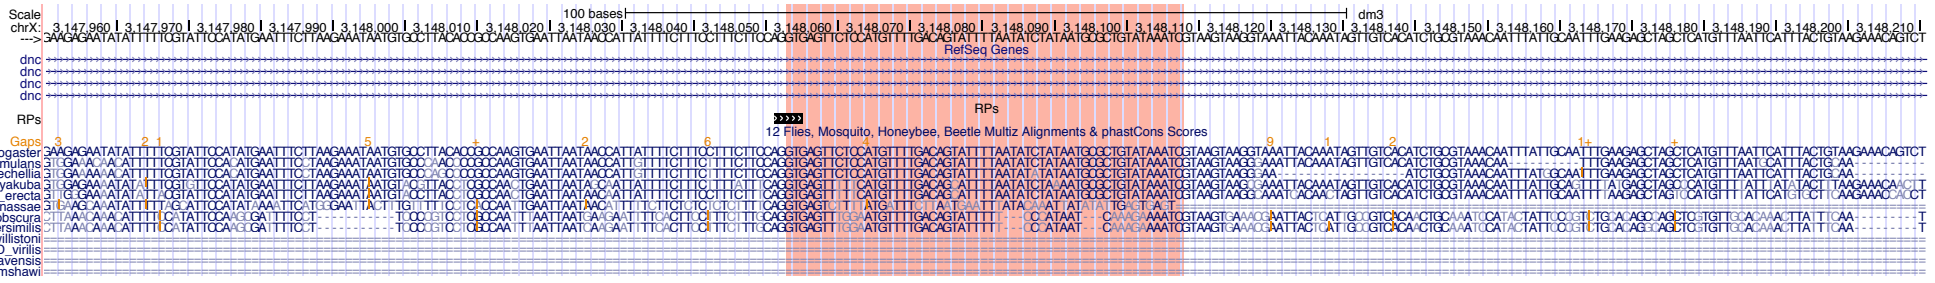

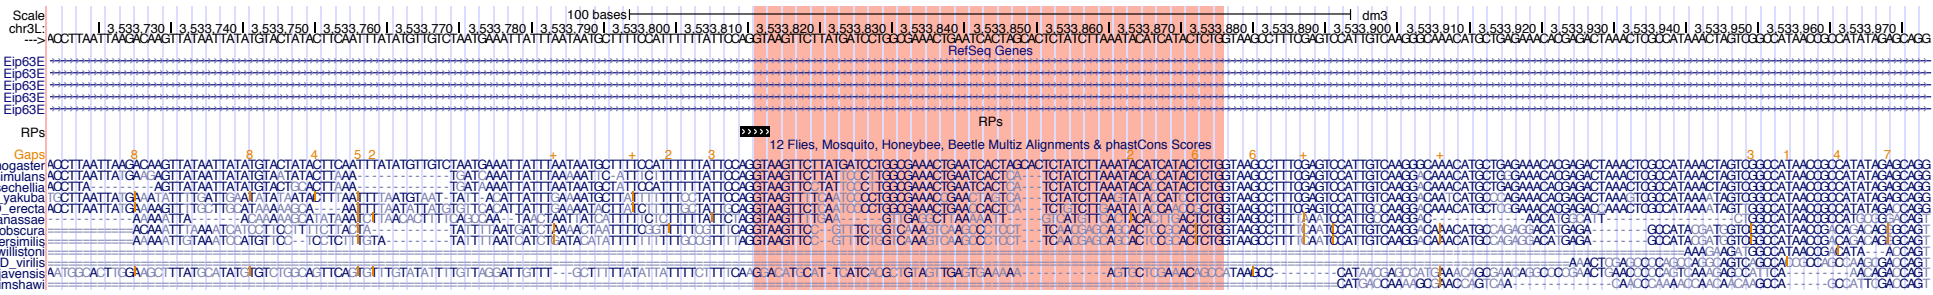

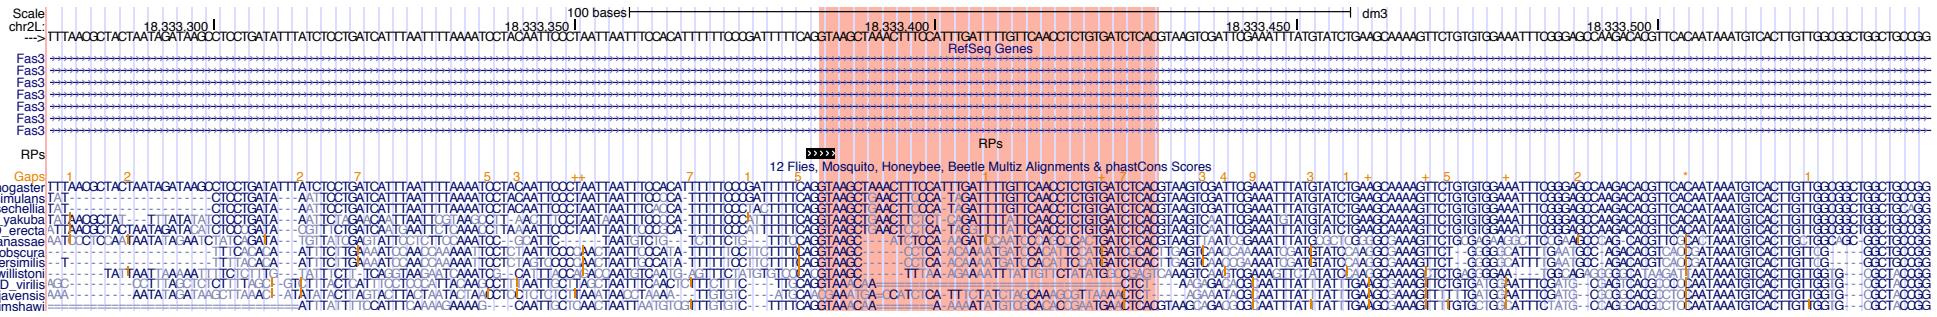

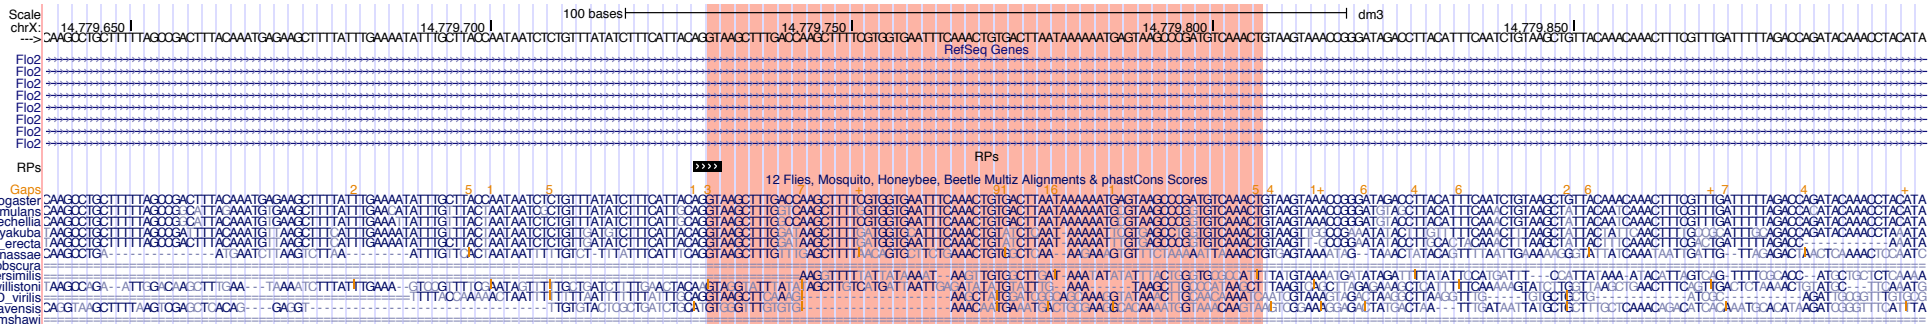

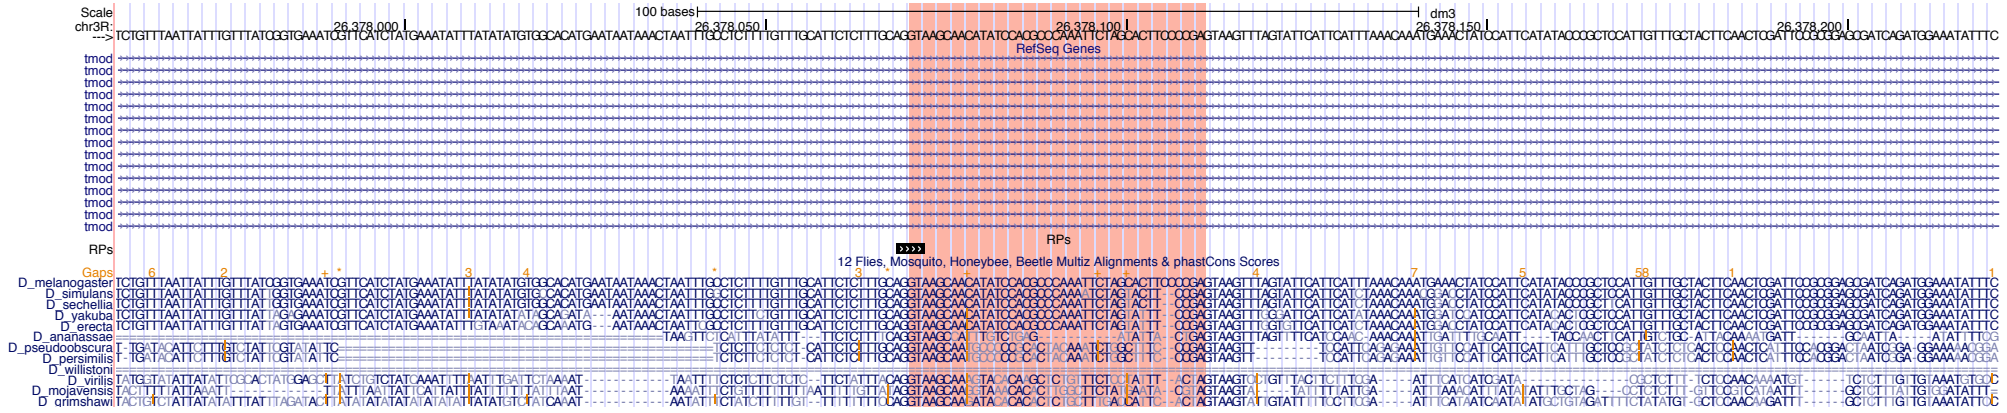

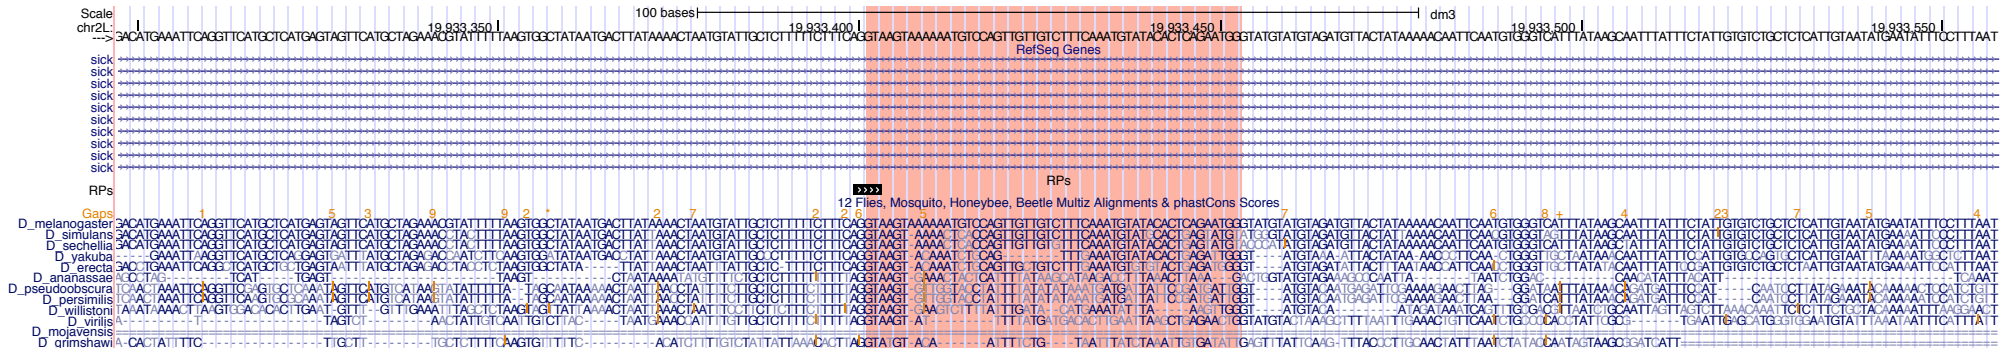



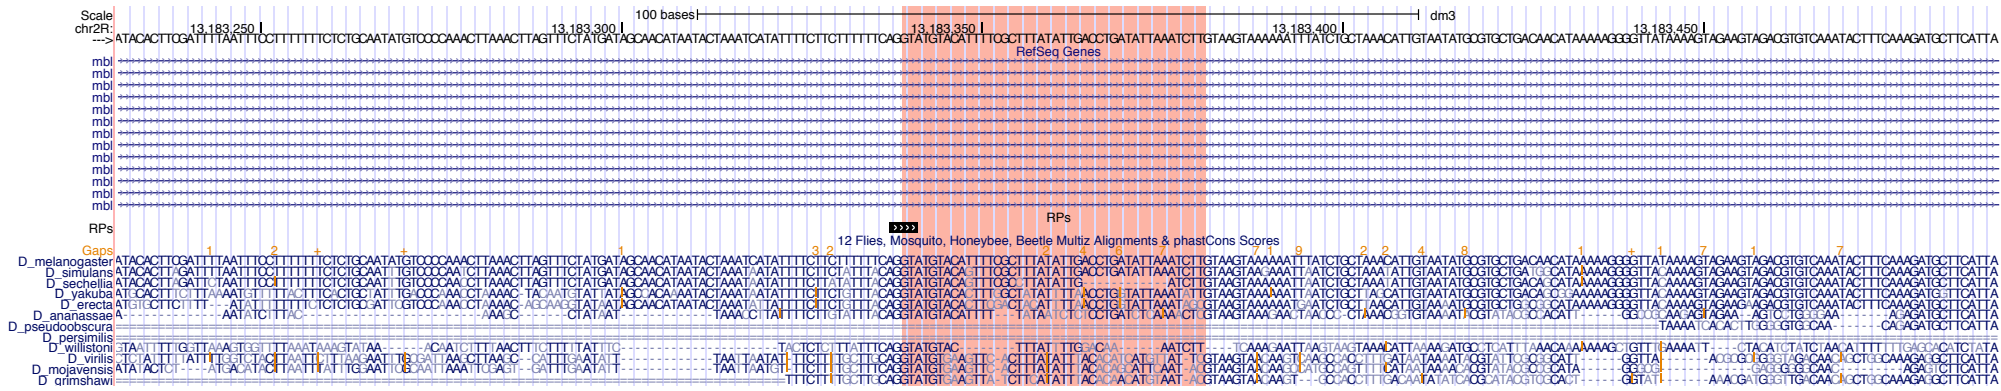

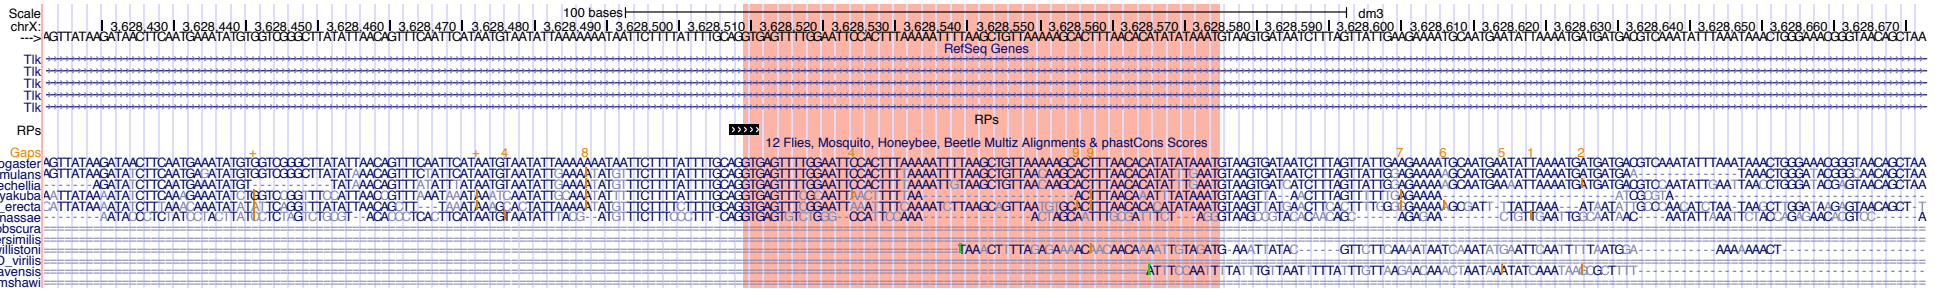



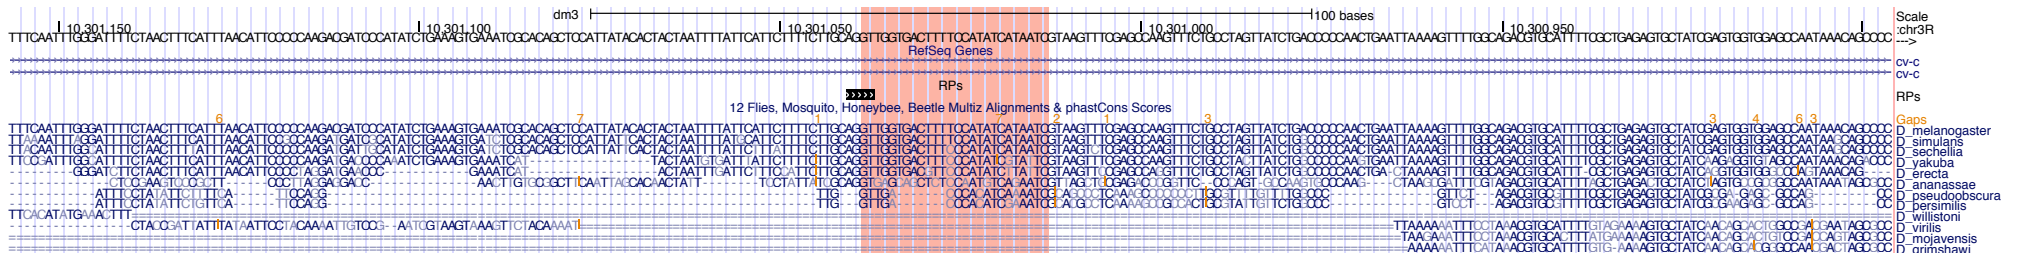

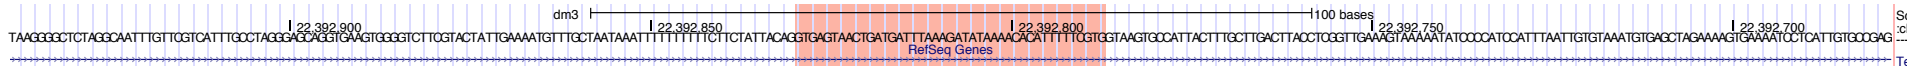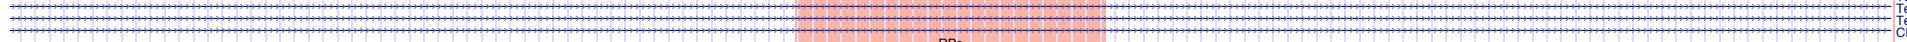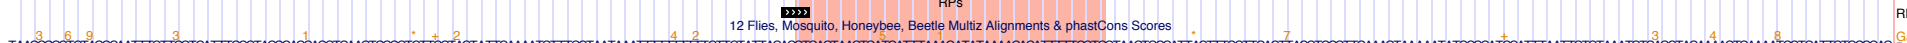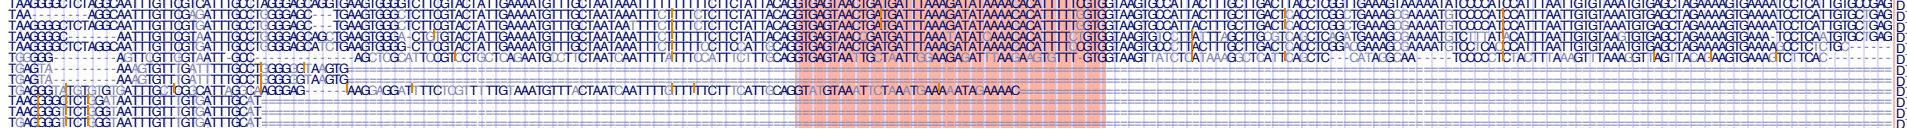

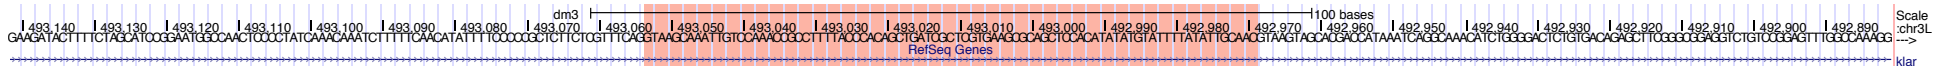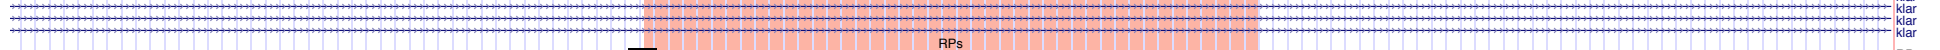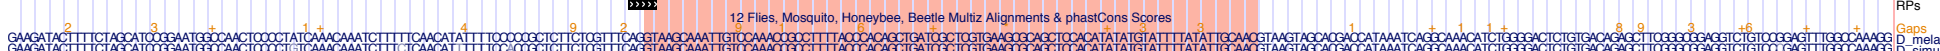

| Species          | Sequence                                                                                                                                                                                                                                                   |
|------------------|------------------------------------------------------------------------------------------------------------------------------------------------------------------------------------------------------------------------------------------------------------|
| D. melanogaster  | GAAGATACTTTTCTAGCATCGGAAATGGCCAACTGCCCATCAAAACAATCTTTTCAACATATTTTCCCGGCTCTCTCGTTCAGGTAAAGCAAAATGTCGAAACCGCCCTTTACCCACAGCTGATGCTCTGTAAGCGACCTCCACATATATGATTTTATATTCGAAAGTAAGTAGCAACCAATAAATCAGGCAAAACATCTGGGACTCTGTGACAGAGCTTGGCGGAGGTCTGTCCGAGTTTGGCAAAAGG |
| D. simulans      | GAAGATACTTTTCTAGCATCGGAAATGGCCAACTGCCCATCAAAACAATCTTTTCAACATATTTTCCCGGCTCTCTCGTTCAGGTAAAGCAAAATGTCGAAACCGCCCTTTACCCACAGCTGATGCTCTGTAAGCGACCTCCACATATATGATTTTATATTCGAAAGTAAGTAGCAACCAATAAATCAGGCAAAACATCTGGGACTCTGTGACAGAGCTTGGCGGAGGTCTGTCCGAGTTTGGCAAAAGG |
| D. sechellia     | GAAGATACTTTTCTAGCATCGGAAATGGCCAACTGCCCATCAAAACAATCTTTTCAACATATTTTCCCGGCTCTCTCGTTCAGGTAAAGCAAAATGTCGAAACCGCCCTTTACCCACAGCTGATGCTCTGTAAGCGACCTCCACATATATGATTTTATATTCGAAAGTAAGTAGCAACCAATAAATCAGGCAAAACATCTGGGACTCTGTGACAGAGCTTGGCGGAGGTCTGTCCGAGTTTGGCAAAAGG |
| D. yakuba        | GAAGATACTTTTCTAGCATCGGAAATGGCCAACTGCCCATCAAAACAATCTTTTCAACATATTTTCCCGGCTCTCTCGTTCAGGTAAAGCAAAATGTCGAAACCGCCCTTTACCCACAGCTGATGCTCTGTAAGCGACCTCCACATATATGATTTTATATTCGAAAGTAAGTAGCAACCAATAAATCAGGCAAAACATCTGGGACTCTGTGACAGAGCTTGGCGGAGGTCTGTCCGAGTTTGGCAAAAGG |
| D. erecta        | GAAGATACTTTTCTAGCATCGGAAATGGCCAACTGCCCATCAAAACAATCTTTTCAACATATTTTCCCGGCTCTCTCGTTCAGGTAAAGCAAAATGTCGAAACCGCCCTTTACCCACAGCTGATGCTCTGTAAGCGACCTCCACATATATGATTTTATATTCGAAAGTAAGTAGCAACCAATAAATCAGGCAAAACATCTGGGACTCTGTGACAGAGCTTGGCGGAGGTCTGTCCGAGTTTGGCAAAAGG |
| D. ananassae     | GAAGATACTTTTCTAGCATCGGAAATGGCCAACTGCCCATCAAAACAATCTTTTCAACATATTTTCCCGGCTCTCTCGTTCAGGTAAAGCAAAATGTCGAAACCGCCCTTTACCCACAGCTGATGCTCTGTAAGCGACCTCCACATATATGATTTTATATTCGAAAGTAAGTAGCAACCAATAAATCAGGCAAAACATCTGGGACTCTGTGACAGAGCTTGGCGGAGGTCTGTCCGAGTTTGGCAAAAGG |
| D. pseudoobscura | GAAGATACTTTTCTAGCATCGGAAATGGCCAACTGCCCATCAAAACAATCTTTTCAACATATTTTCCCGGCTCTCTCGTTCAGGTAAAGCAAAATGTCGAAACCGCCCTTTACCCACAGCTGATGCTCTGTAAGCGACCTCCACATATATGATTTTATATTCGAAAGTAAGTAGCAACCAATAAATCAGGCAAAACATCTGGGACTCTGTGACAGAGCTTGGCGGAGGTCTGTCCGAGTTTGGCAAAAGG |
| D. persimilis    | GAAGATACTTTTCTAGCATCGGAAATGGCCAACTGCCCATCAAAACAATCTTTTCAACATATTTTCCCGGCTCTCTCGTTCAGGTAAAGCAAAATGTCGAAACCGCCCTTTACCCACAGCTGATGCTCTGTAAGCGACCTCCACATATATGATTTTATATTCGAAAGTAAGTAGCAACCAATAAATCAGGCAAAACATCTGGGACTCTGTGACAGAGCTTGGCGGAGGTCTGTCCGAGTTTGGCAAAAGG |
| D. willistoni    | GAAGATACTTTTCTAGCATCGGAAATGGCCAACTGCCCATCAAAACAATCTTTTCAACATATTTTCCCGGCTCTCTCGTTCAGGTAAAGCAAAATGTCGAAACCGCCCTTTACCCACAGCTGATGCTCTGTAAGCGACCTCCACATATATGATTTTATATTCGAAAGTAAGTAGCAACCAATAAATCAGGCAAAACATCTGGGACTCTGTGACAGAGCTTGGCGGAGGTCTGTCCGAGTTTGGCAAAAGG |
| D. virilis       | GAAGATACTTTTCTAGCATCGGAAATGGCCAACTGCCCATCAAAACAATCTTTTCAACATATTTTCCCGGCTCTCTCGTTCAGGTAAAGCAAAATGTCGAAACCGCCCTTTACCCACAGCTGATGCTCTGTAAGCGACCTCCACATATATGATTTTATATTCGAAAGTAAGTAGCAACCAATAAATCAGGCAAAACATCTGGGACTCTGTGACAGAGCTTGGCGGAGGTCTGTCCGAGTTTGGCAAAAGG |
| D. mojavensis    | GAAGATACTTTTCTAGCATCGGAAATGGCCAACTGCCCATCAAAACAATCTTTTCAACATATTTTCCCGGCTCTCTCGTTCAGGTAAAGCAAAATGTCGAAACCGCCCTTTACCCACAGCTGATGCTCTGTAAGCGACCTCCACATATATGATTTTATATTCGAAAGTAAGTAGCAACCAATAAATCAGGCAAAACATCTGGGACTCTGTGACAGAGCTTGGCGGAGGTCTGTCCGAGTTTGGCAAAAGG |
| D. rimshawi      | GAAGATACTTTTCTAGCATCGGAAATGGCCAACTGCCCATCAAAACAATCTTTTCAACATATTTTCCCGGCTCTCTCGTTCAGGTAAAGCAAAATGTCGAAACCGCCCTTTACCCACAGCTGATGCTCTGTAAGCGACCTCCACATATATGATTTTATATTCGAAAGTAAGTAGCAACCAATAAATCAGGCAAAACATCTGGGACTCTGTGACAGAGCTTGGCGGAGGTCTGTCCGAGTTTGGCAAAAGG |



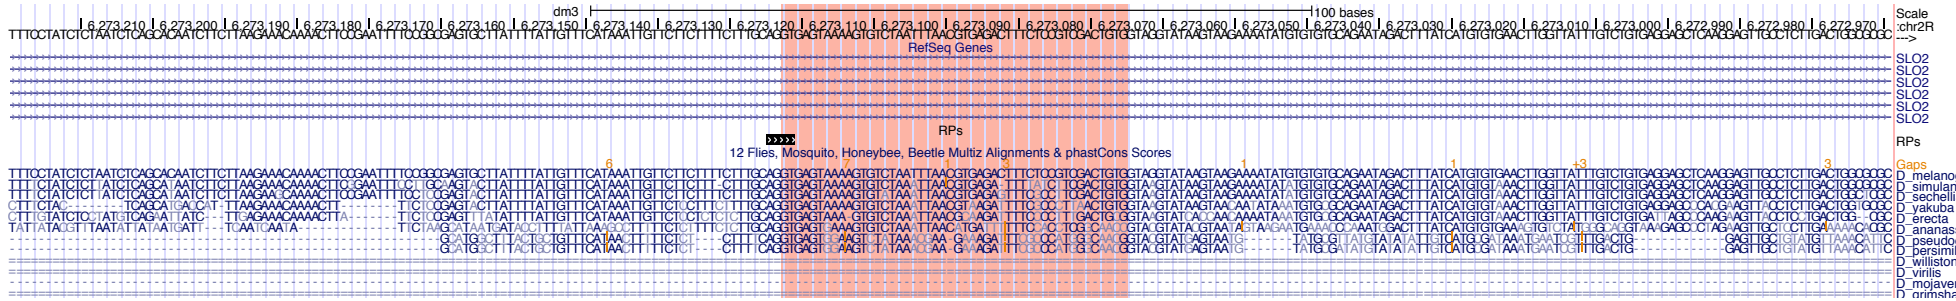





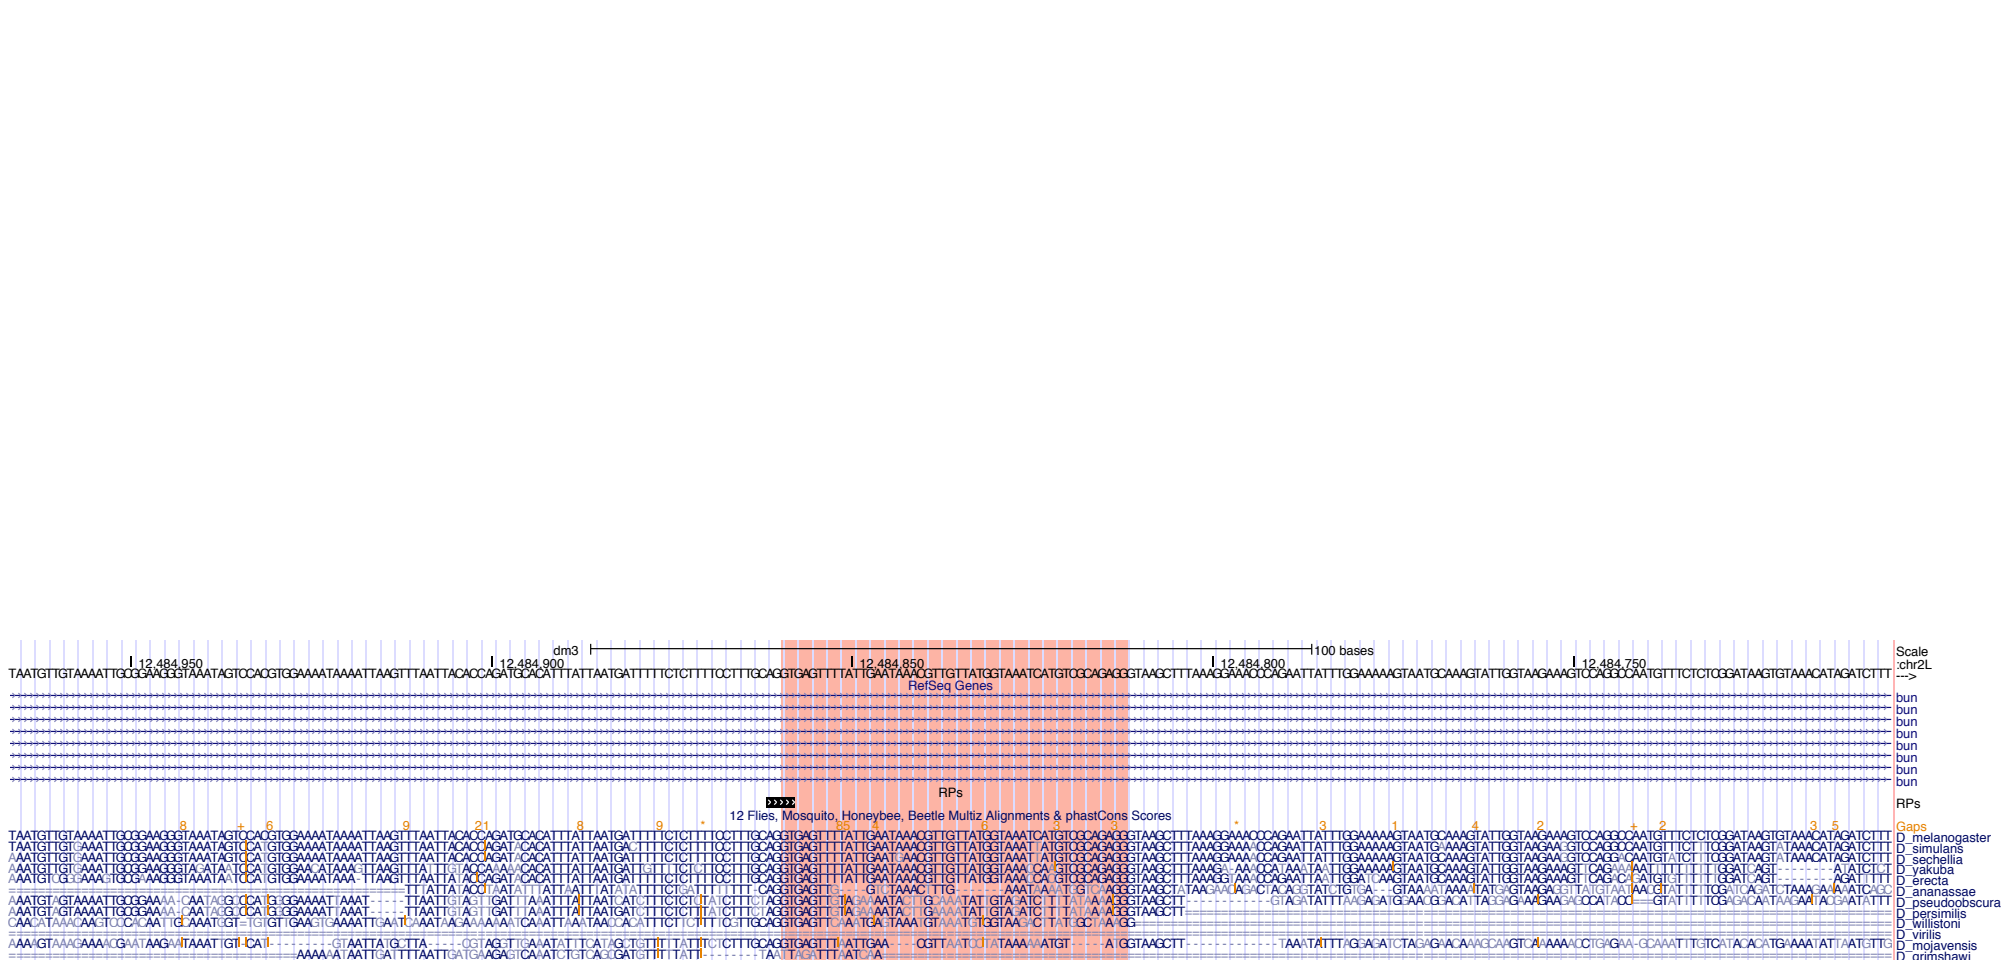

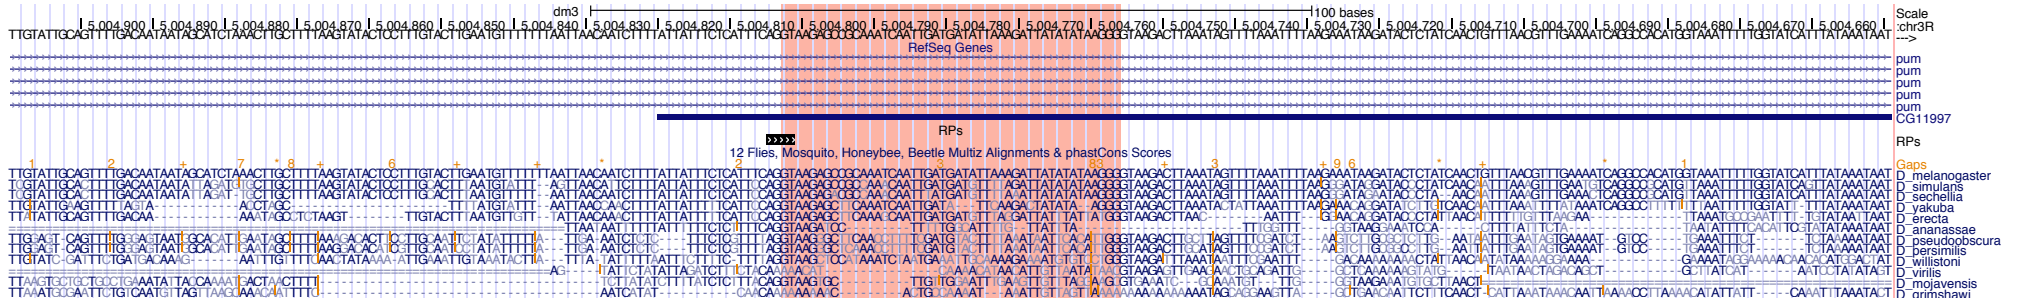

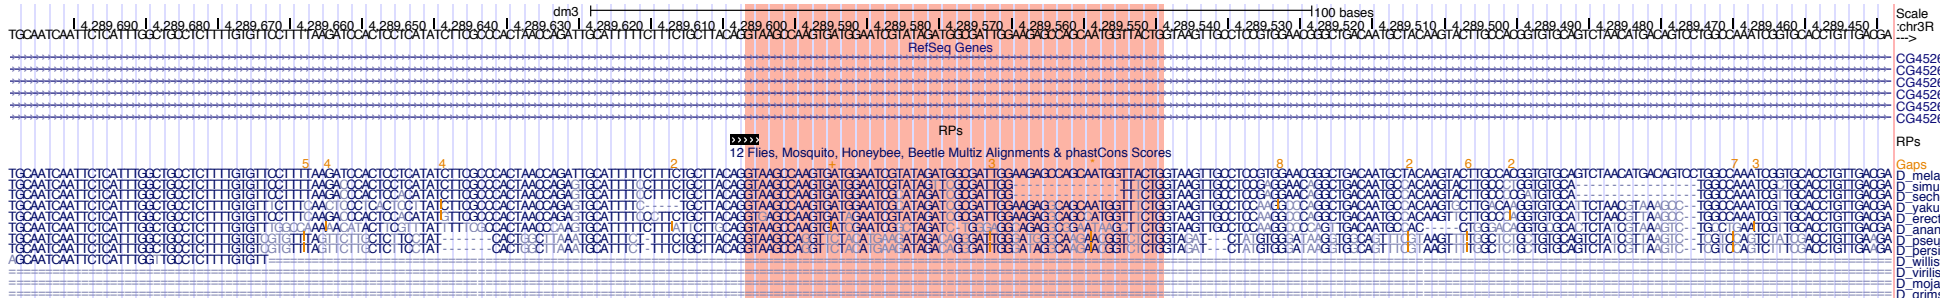

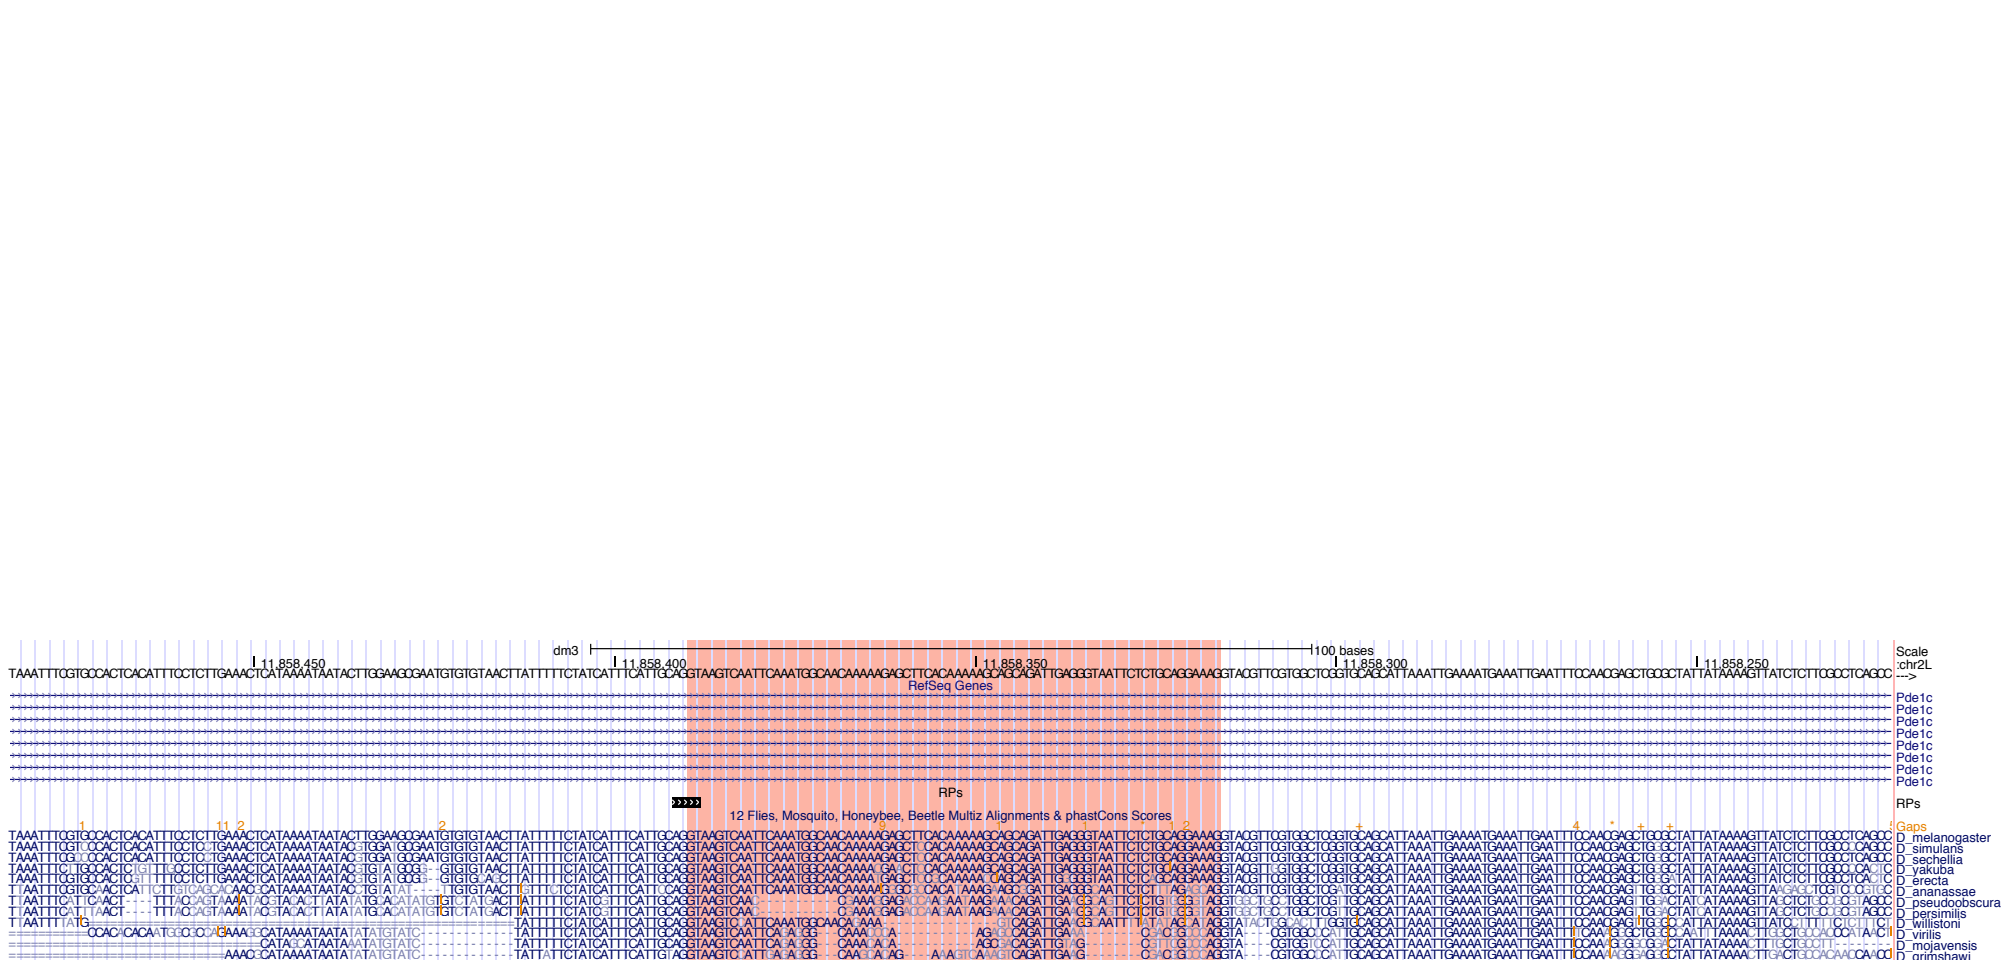





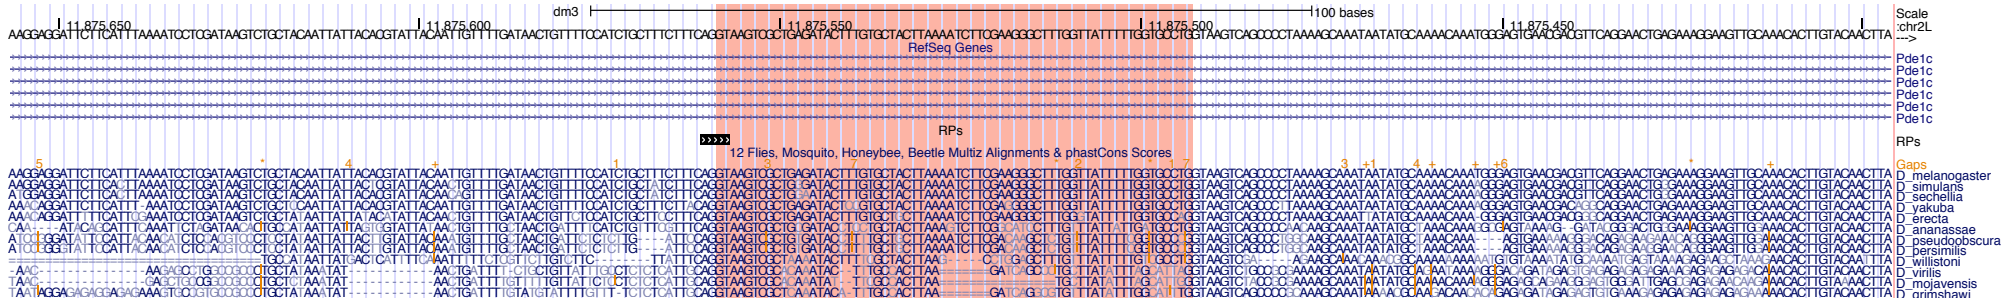



1 4,989,450 | 4,989,440 | 4,989,430 | 4,989,420 | 4,989,410 | 4,989,400 | 4,989,390 | 4,989,380 | 4,989,370 | 4,989,360 | 4,989,350 | 4,989,340 | 4,989,330 | 4,989,320 | 4,989,310 | 4,989,300 | 4,989,290 | 4,989,280 | 4,989,270 | 4,989,260 | 4,989,250 | 4,989,240 | 4,989,230 | 4,989,220 | 4,989,210 | Scale chr3R  
AGGAATGTAGATGAAATGCGATAAACATACATTTTAAAGTAAATGTTACCAATTCCTCAGAAATGGTATTAATAATTTGGCAATGTCCTTATCATTCGAGGTACGGTAAATGATTTCAAAAAAGTATCAAAAAATGTAATTTGTTTTATAATGTAAGTGGCAATGAACTTTATGGTGTGGTATTTAAAAATCTGTGGAATGAAACAGCTTATGGTGGTCATTTATAAATCTAAAAAAGAGC

RelSeq Genes

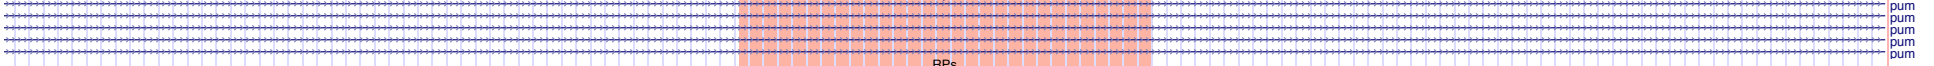

RP

12 Flies, Mosquito, Honeybee, Beetle Multiz Alignments & phastCons Scores

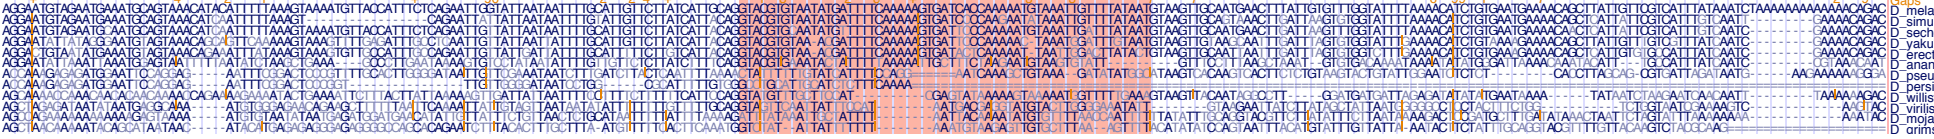





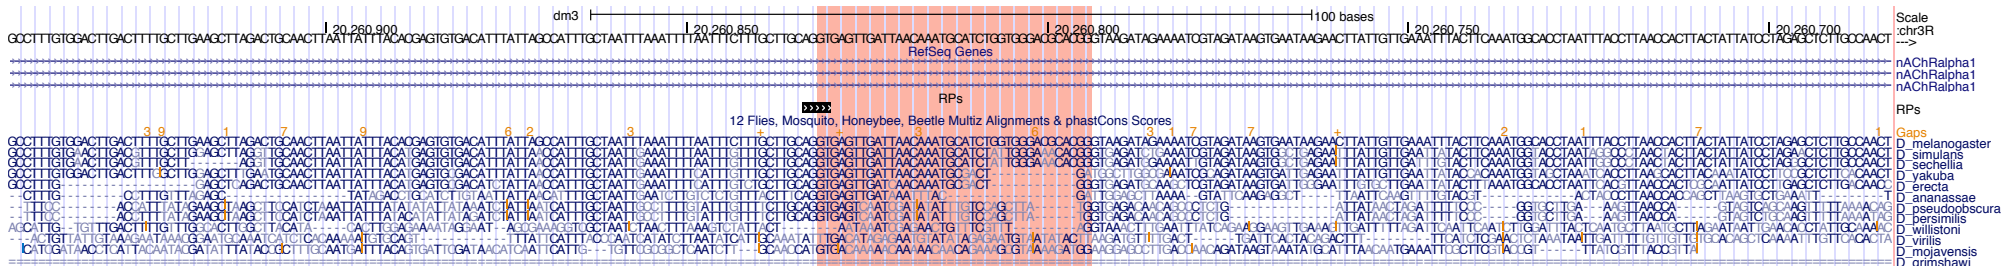



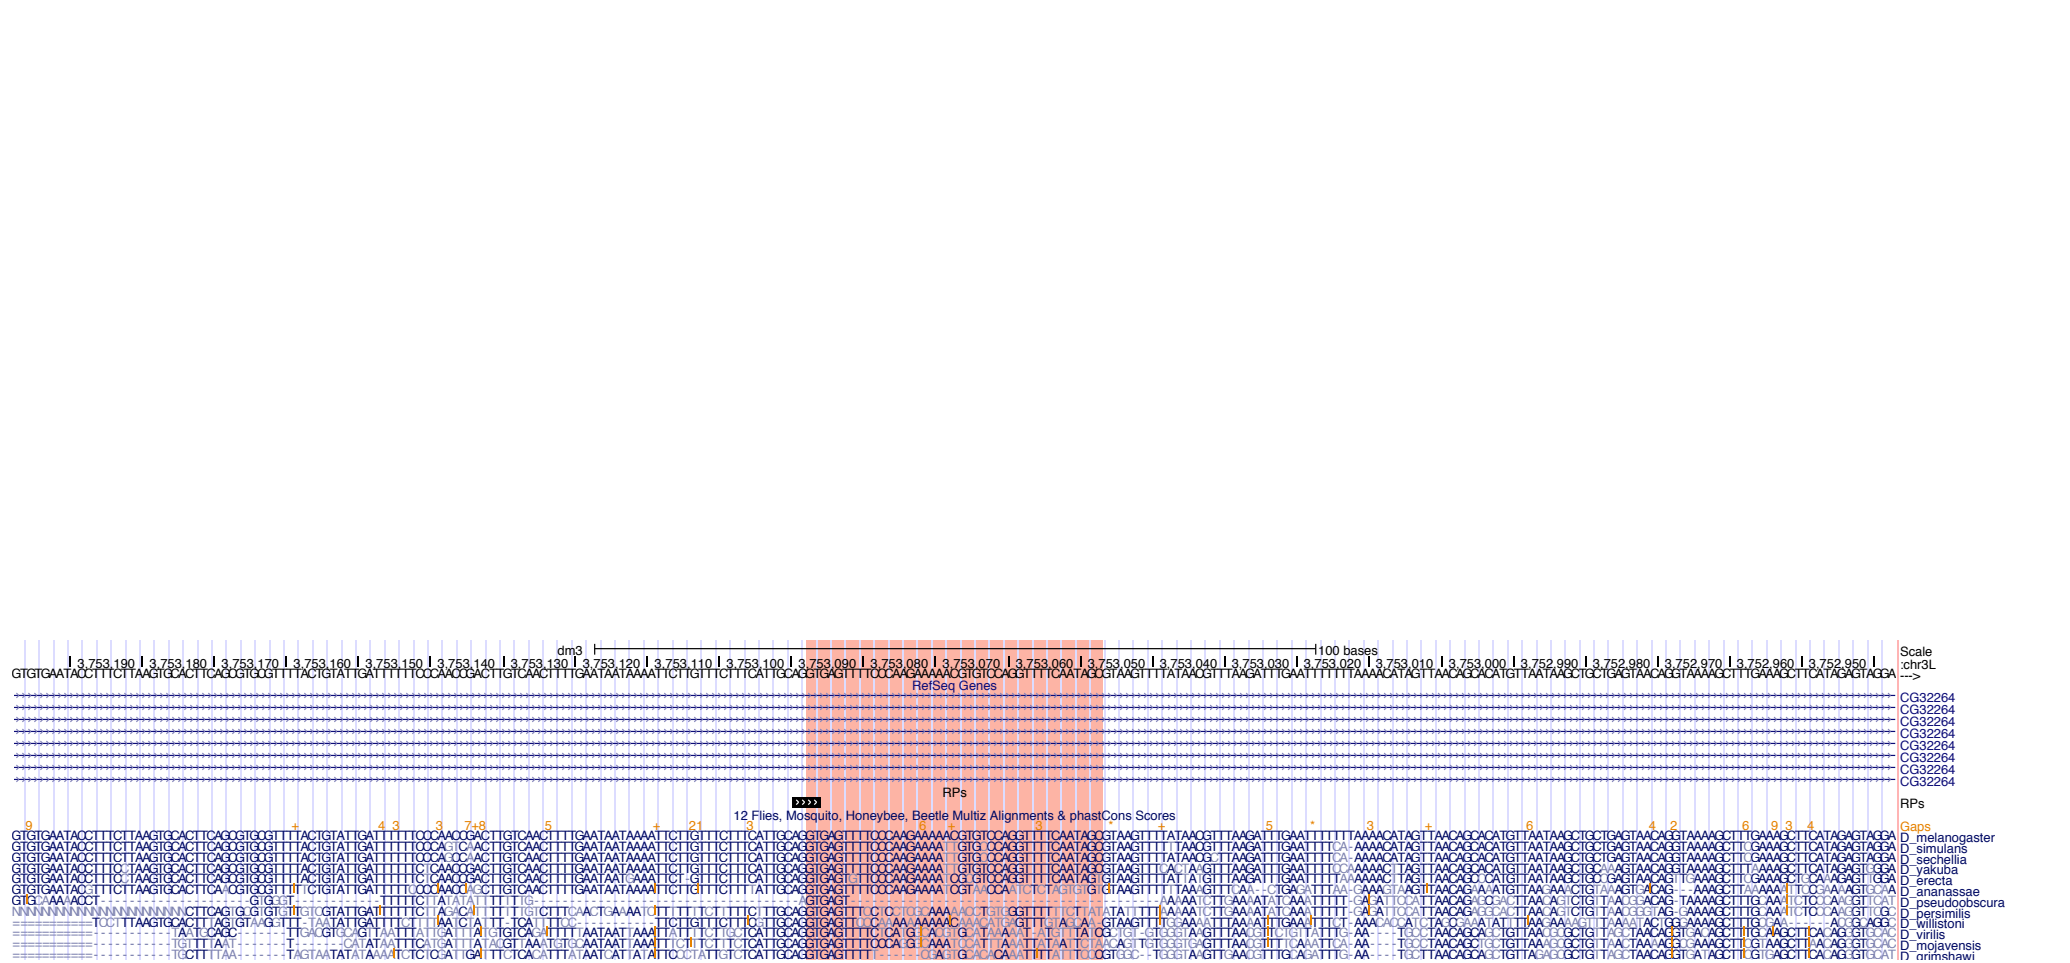

3,753,190 | 3,753,180 | 3,753,170 | 3,753,160 | 3,753,150 | 3,753,140 | 3,753,130 | 3,753,120 | 3,753,110 | 3,753,100 | 3,753,090 | 3,753,080 | 3,753,070 | 3,753,060 | 3,753,050 | 3,753,040 | 3,753,030 | 3,753,020 | 3,753,010 | 3,753,000 | 3,752,990 | 3,752,980 | 3,752,970 | 3,752,960 | 3,752,950 |

GTGTGAATACCTTCTTAAGTGCACCTCAGGGTGGTTTACGTGATTTGATTTTTCOCACCGACTTGTCAACTTTGAATAATAAAAATCTGTGTTCTTTCATTCAGGTGAGTTTCCCAAGAAAAGGTGTCAGGTTTCAATAGGTAGTTTATAAGTTTAAAGTTTAAACATAGTTAACAGCACATGTTAATAGCTGCTGATTAACAGTAAAGCTTTGAAAGCTTCATAGAGTAGCA

CG32264  
CG32264  
CG32264  
CG32264  
CG32264  
CG32264  
CG32264  
CG32264

RPs  
 12 Files, Mosquito, Honeybee, Beetle Multiz Alignments & phastCons Scores  
 Gaps  
 D. melanogaster  
D. simulans  
D. sechellia  
D. yakuba  
D. erecta  
D. anansae  
D. pseudoobscura  
D. persimilis  
D. willistoni  
D. virilis  
D. mjayensis  
D. ornishawi

1 5 187 010 | 1 5 187 000 | 1 5 186 990 | 1 5 186 980 | 1 5 186 970 | 1 5 186 960 | 1 5 186 950 | 1 5 186 940 | 1 5 186 930 | 1 5 186 920 | 1 5 186 910 | 1 5 186 900 | 1 5 186 890 | 1 5 186 880 | 1 5 186 870 | 1 5 186 860 | 1 5 186 850 | 1 5 186 840 | 1 5 186 830 | 1 5 186 820 | 1 5 186 810 | 1 5 186 800 | 1 5 186 790 | 1 5 186 780 | 1 5 186 770 |

TCGAGTATAATAATGTCACAGCCCTTCAATATGATCCCTTIGTTTCCAAACAATGGTATGACCAATCGCTCAACCTTTCCTCTCTATTTTTTCAGGTAAGTTTCAAAAGAAATTTTATGAGGTAAGCAAGAAAAAGATGCAAGAAATGAGTAAGTTGGGGTTAACAAAAAATAACAGTTGGGATAGCCCGCCACCTTGCCTCCCTTTGTCCCTGCTGCAATTTGCTGTTAAATTATTCAAGAG

RelSeq Genes

RPAs

12 Flies, Mosquito, Honeybee, Beetle Multiz Alignments & phasiCons Scores

Gaps

D melanogaster  
D simulans  
D sechellia  
D yakuba  
D erecta  
D ananassae  
D pseudoobscura  
D persimilis  
D willistoni  
D virilis  
D mojavensis  
D orinshawii

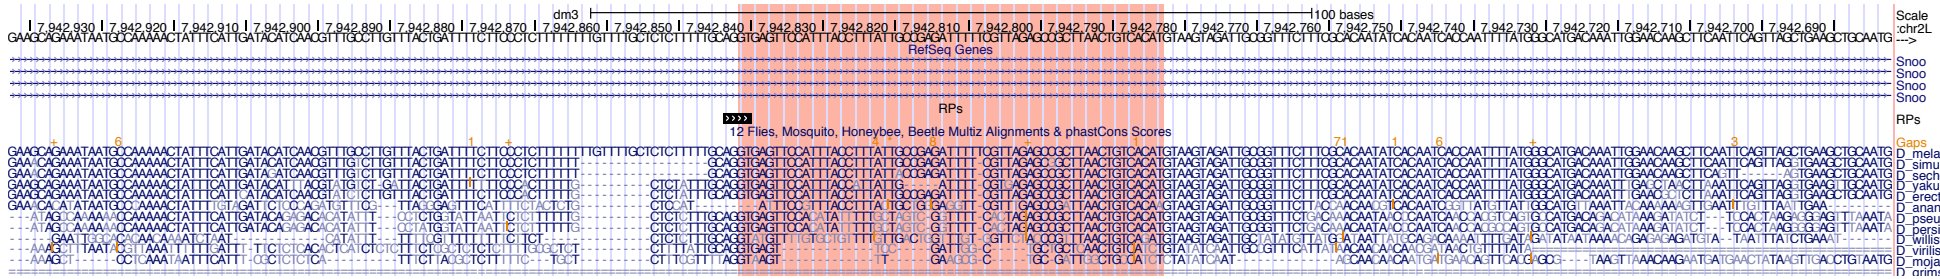







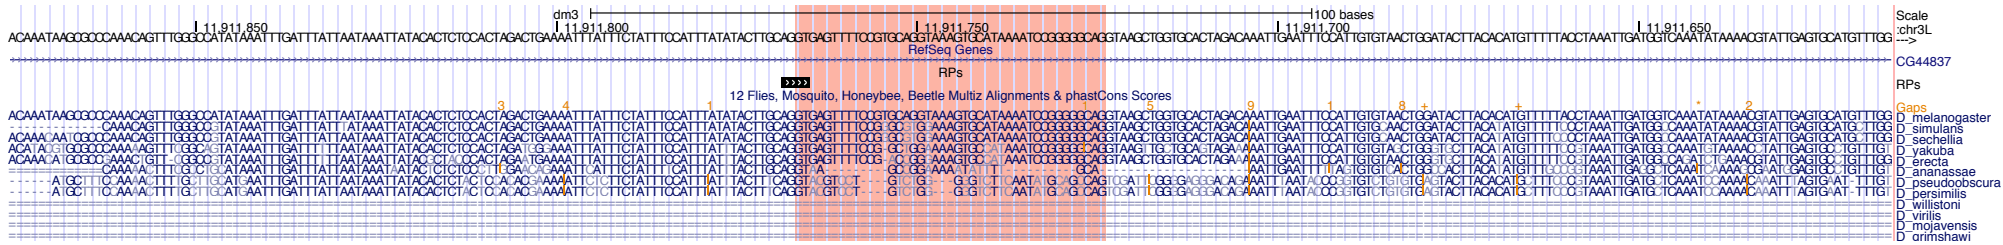

Supplement: NIHMS1041148-supplement-Supplemental_Dataset_5.pdf [file NIHMS1041148-supplement-Supplemental_Dataset_5.pdf]
