# Supplementary material
Source: PubMed Central journal article supplement (PMC6709686)

**Supplementary Data Set 4. Examples of Drosophila RP-exons.** Shown are UCSC Genome Browser screenshots with gene models and RNA-seq evidence at cassette exons that can regenerate conserved 5' splice sites.

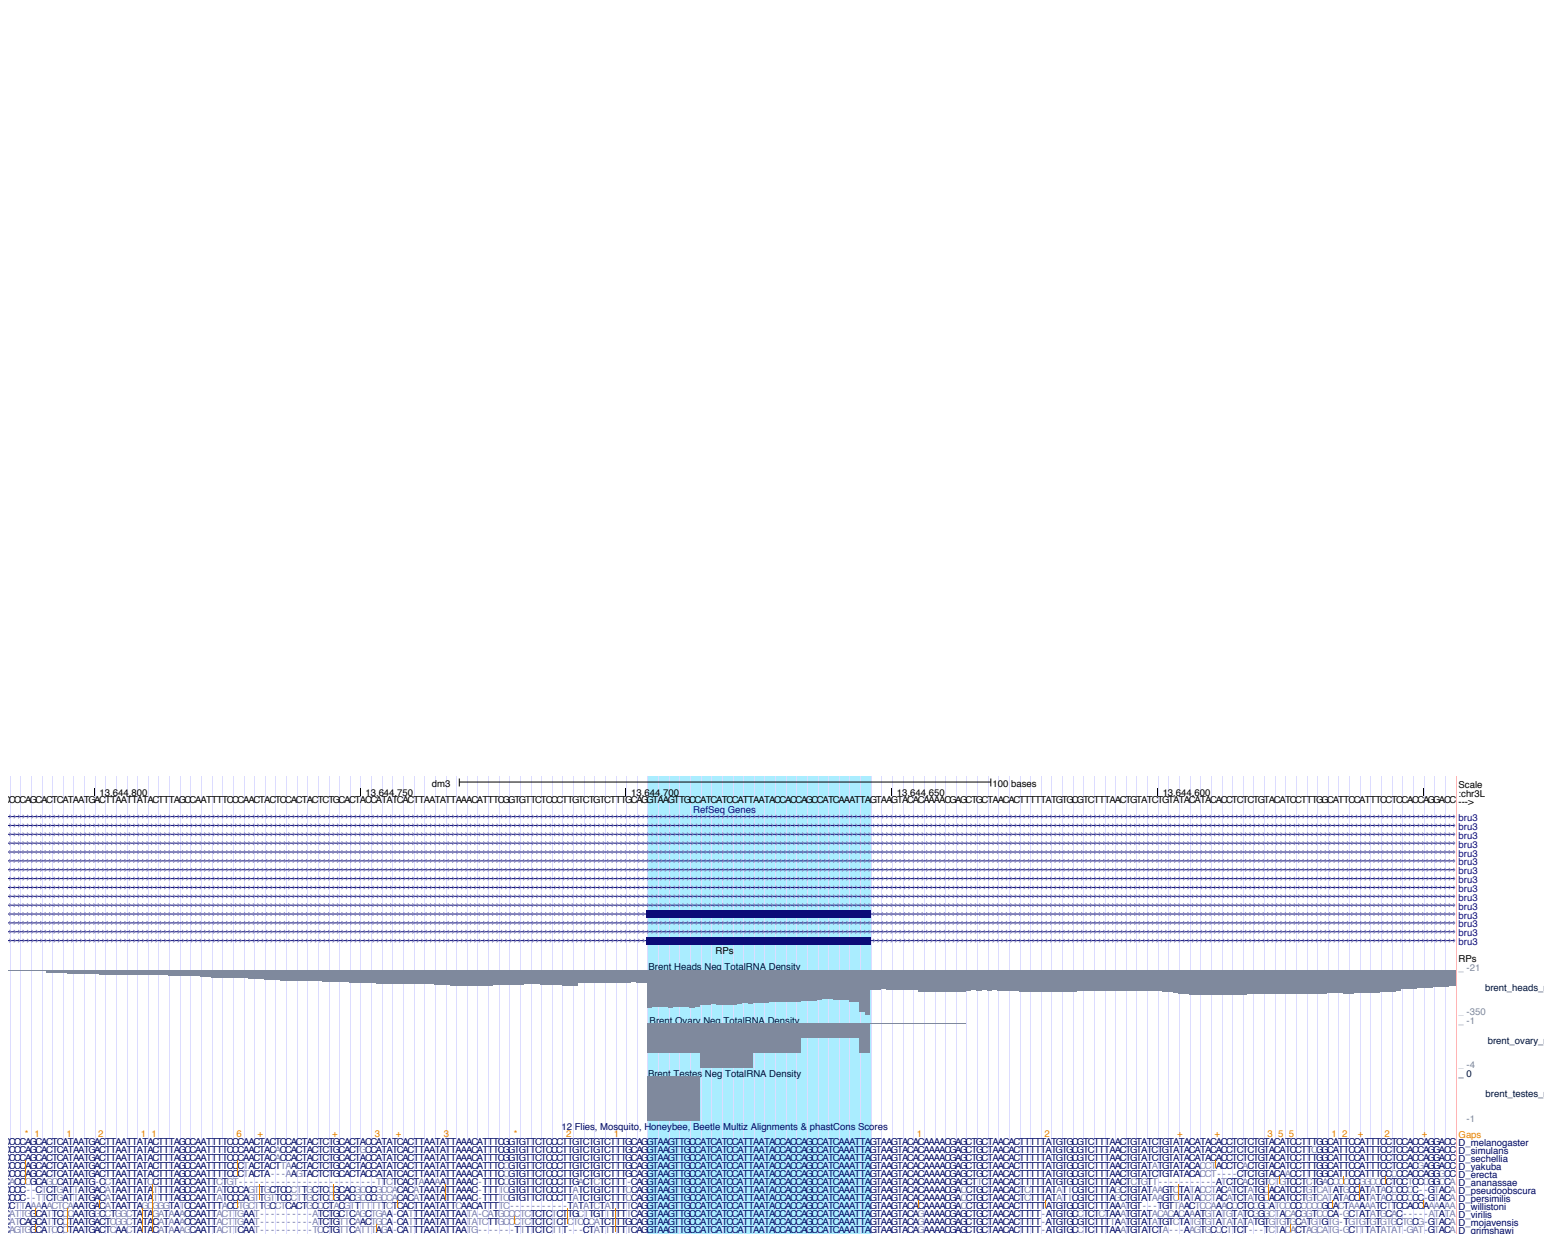

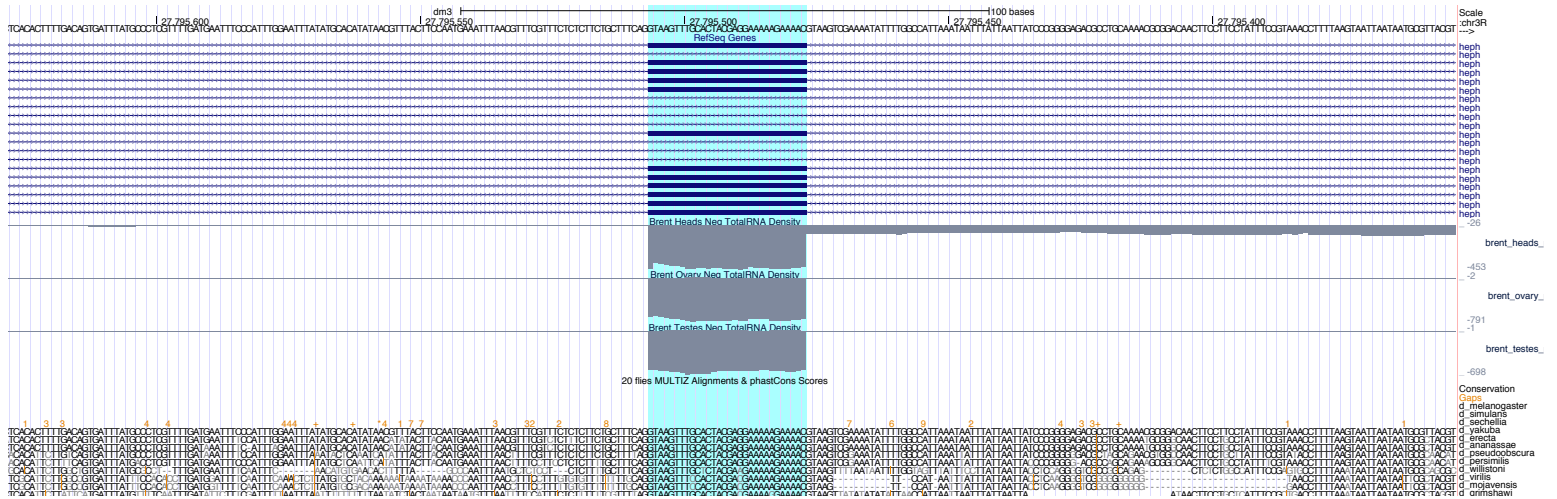

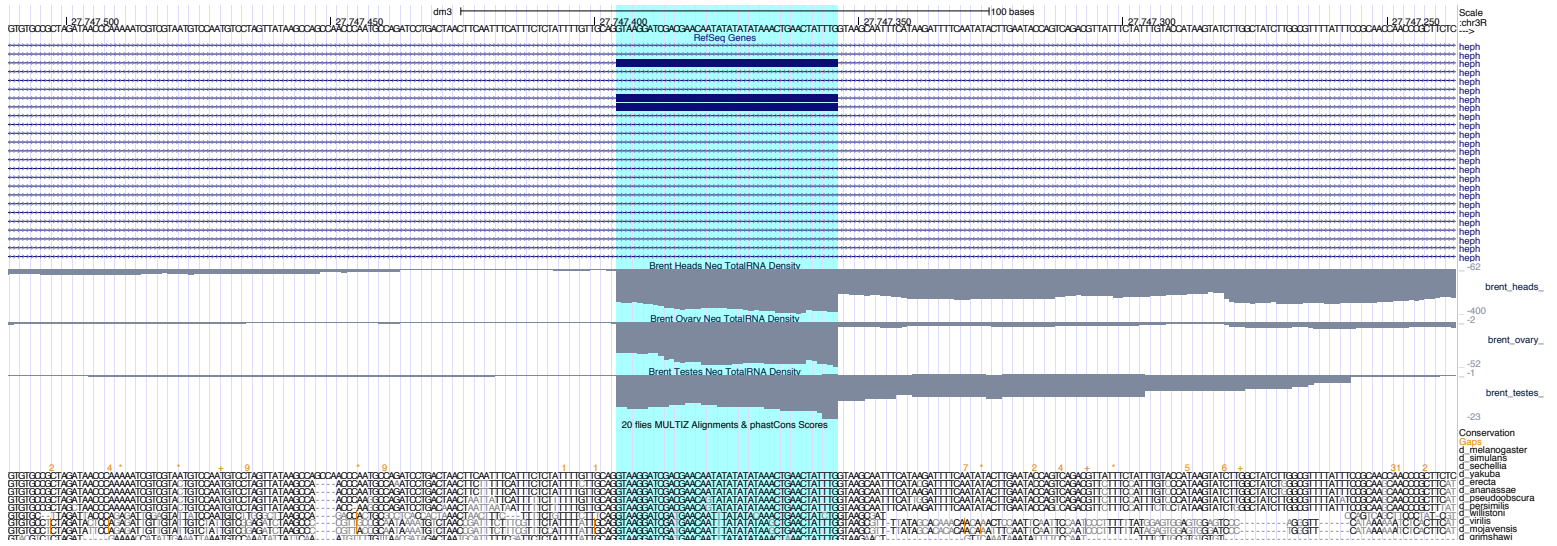

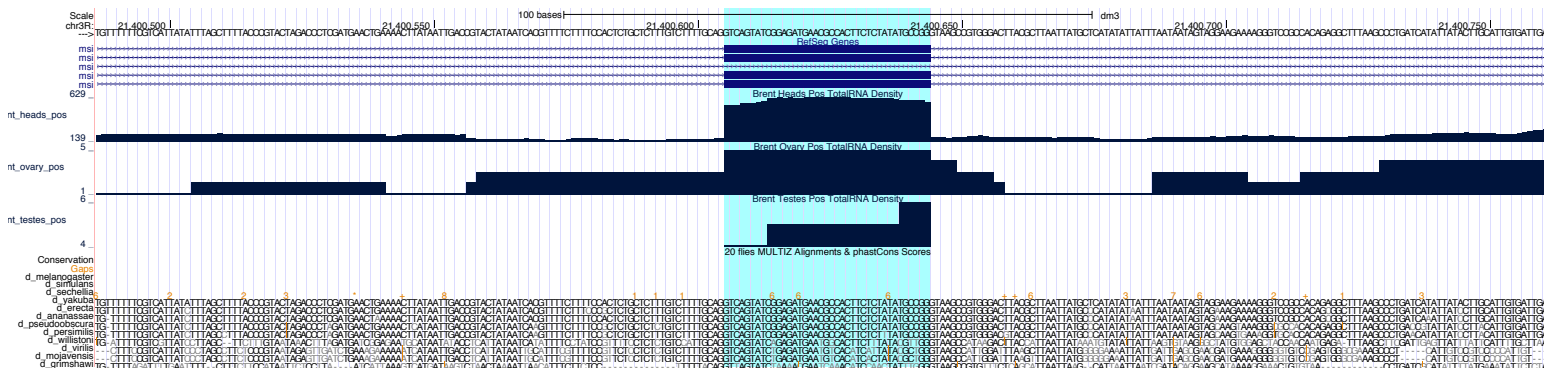

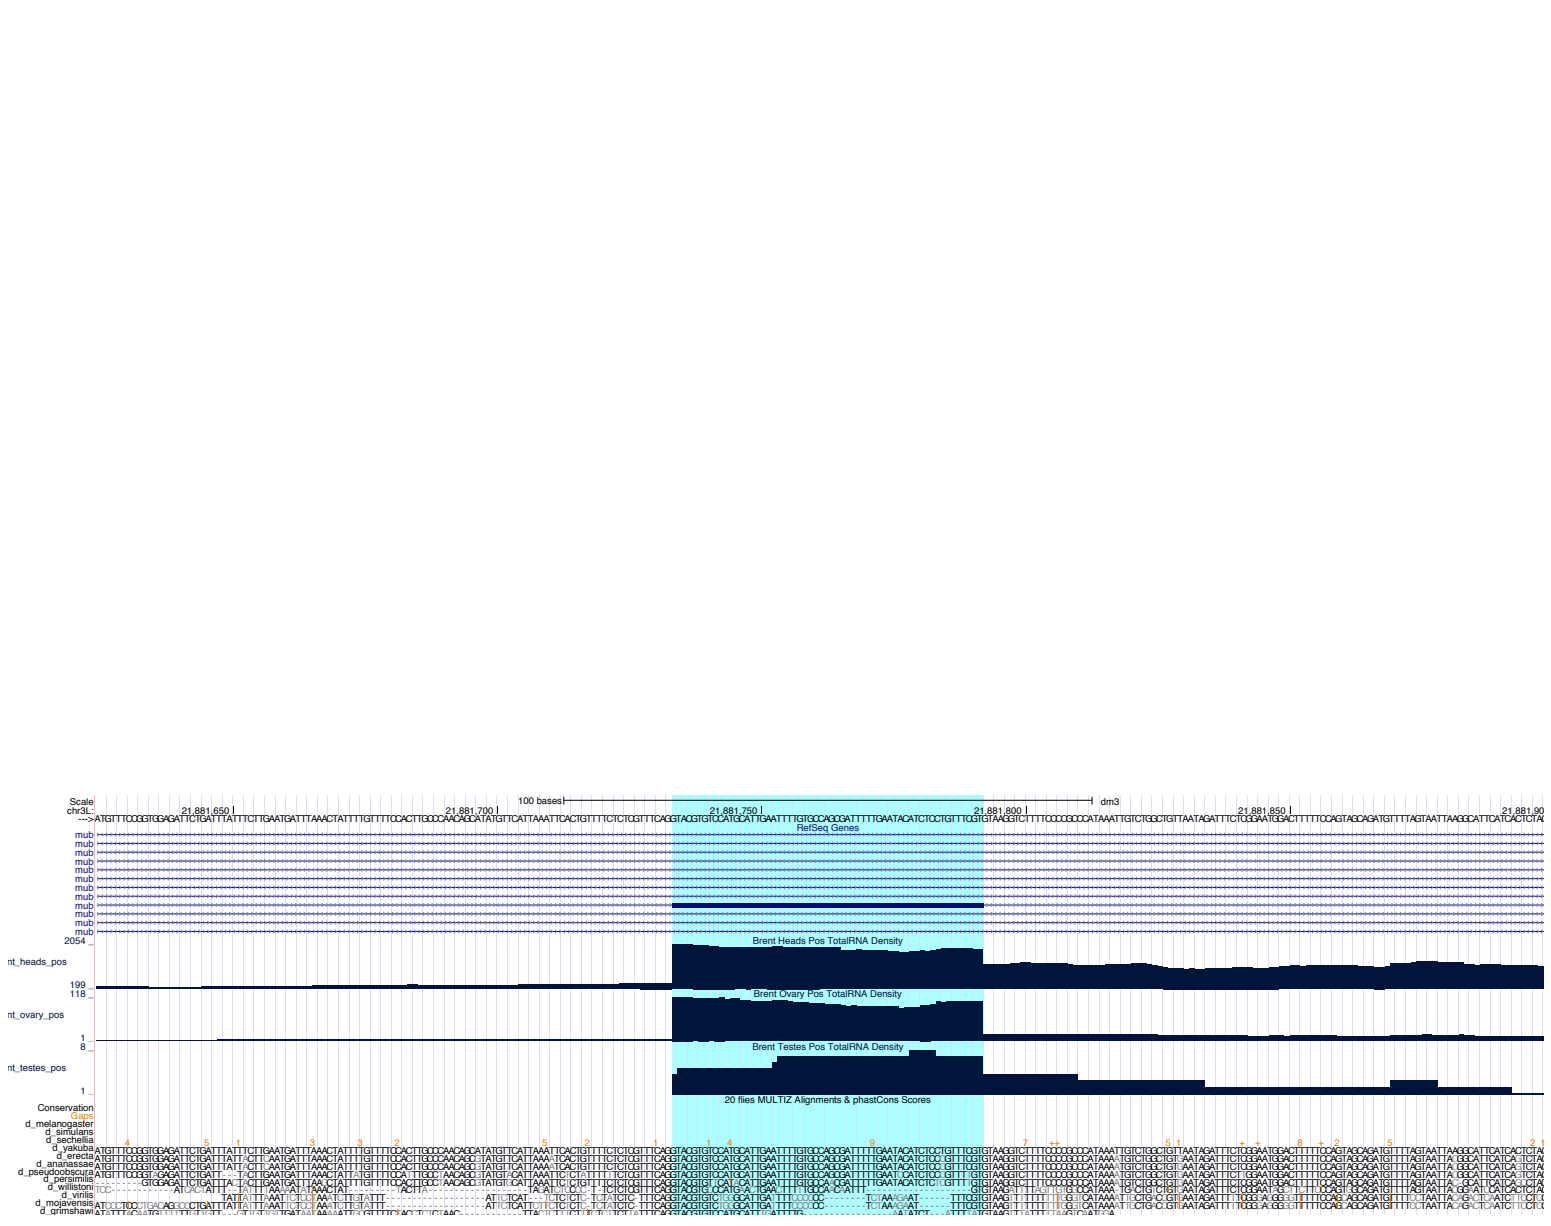

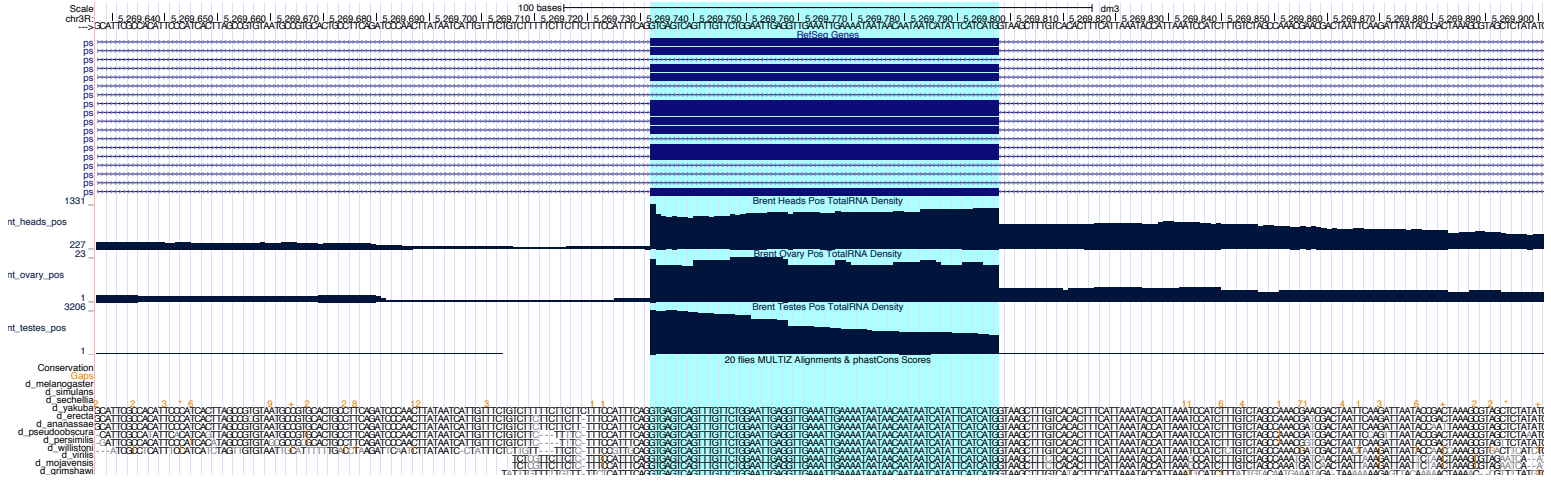

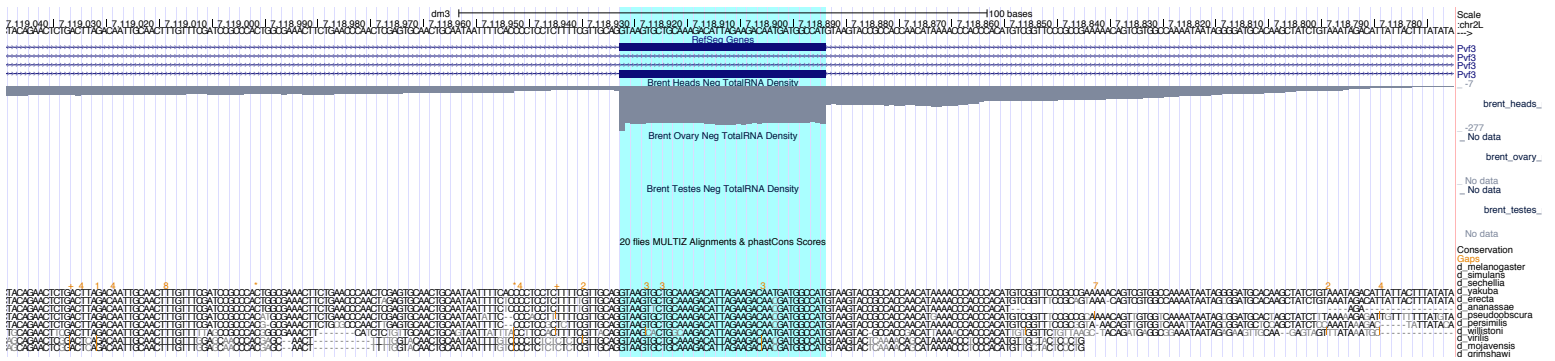



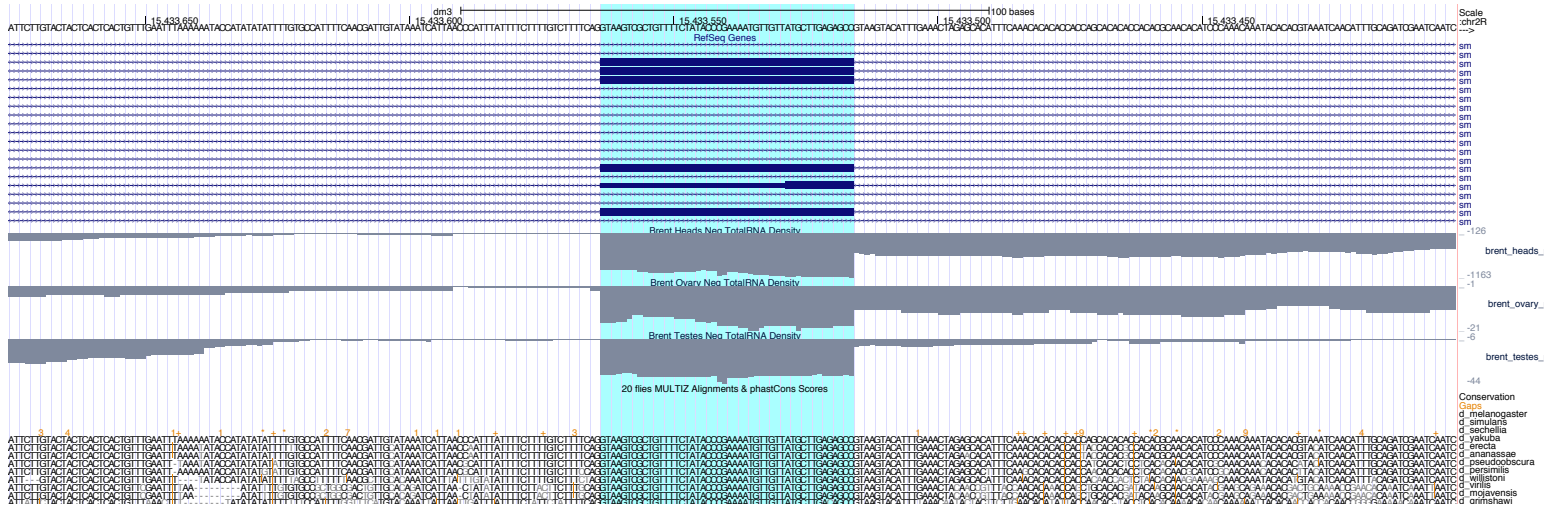

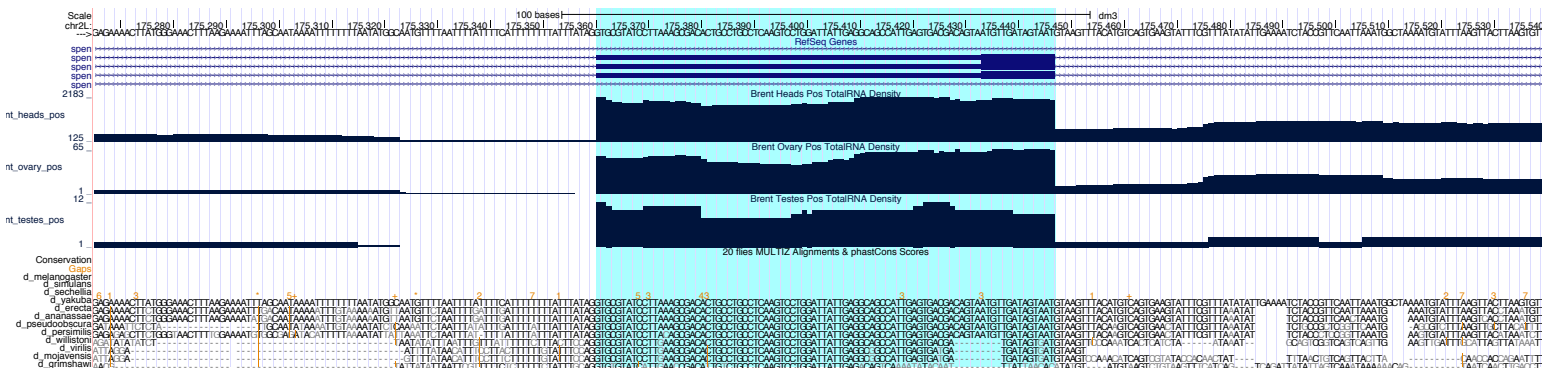

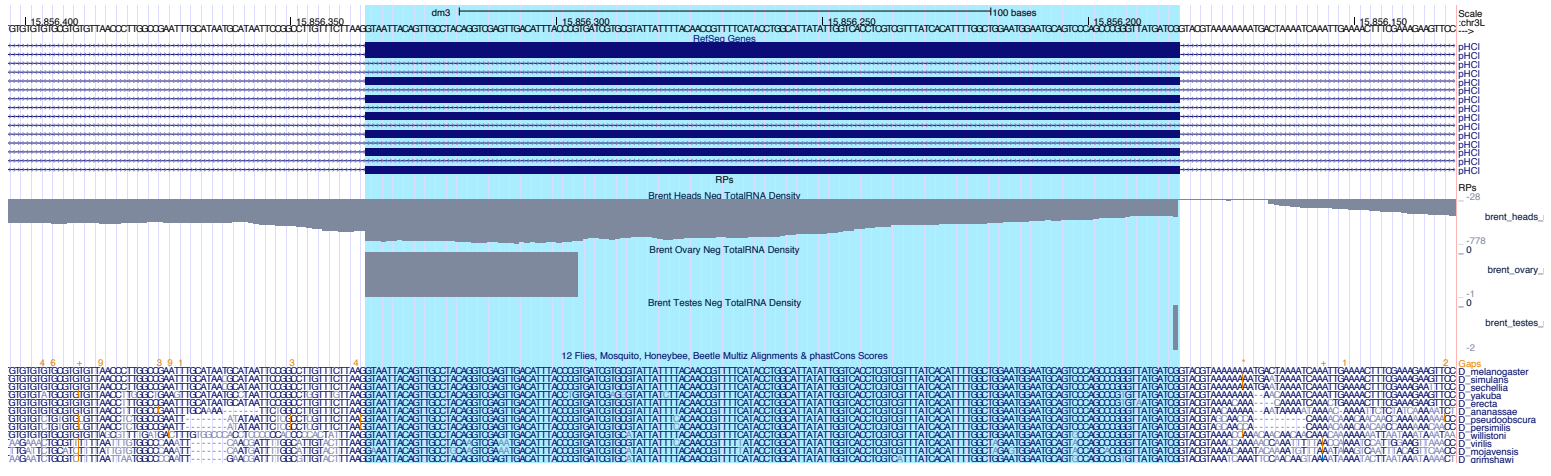

Supplement: NIHMS1041148-supplement-Supplemental_Dataset_4.pdf [file NIHMS1041148-supplement-Supplemental_Dataset_4.pdf]
