# Supplementary material
Source: PubMed Central journal article supplement (PMC6709686)
Supplement: NIHMS1041148-supplement-Supplemental_Note.pdf [file NIHMS1041148-supplement-Supplemental_Note.pdf]

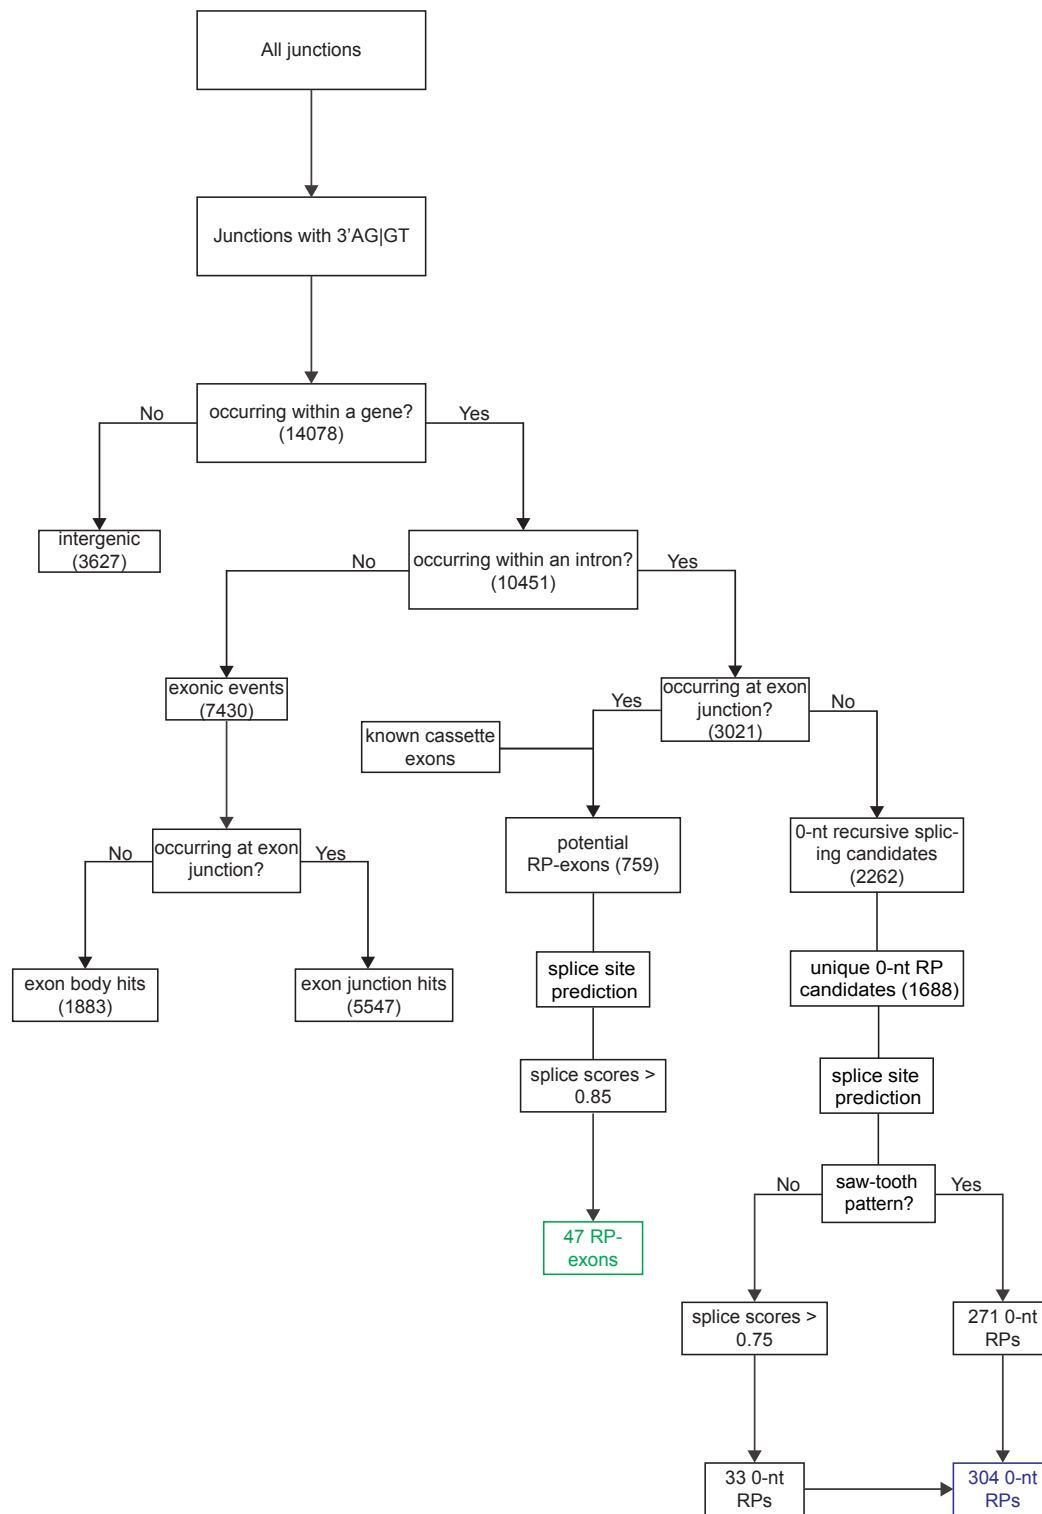

**Supplementary Note 1.** Pipeline to annotate novel intronic RPs and RP-exons. Flowchart displays criteria used to classify junction spanning reads into categories such as exon body hits, exon junction hits, intergenic, and candidate RP classes: potential RP-exons and 0nt recursive splicing candidates. Following initial characterization, RP-exon and 0-nt exon candidates were further vetted as indicated by requiring strict splice scores, as quantified by NNSPLICE and manually checking for sawtooth pattern in RNA-seq data.
