# Supplementary material
Source: PubMed Central journal article supplement (PMC6709686)

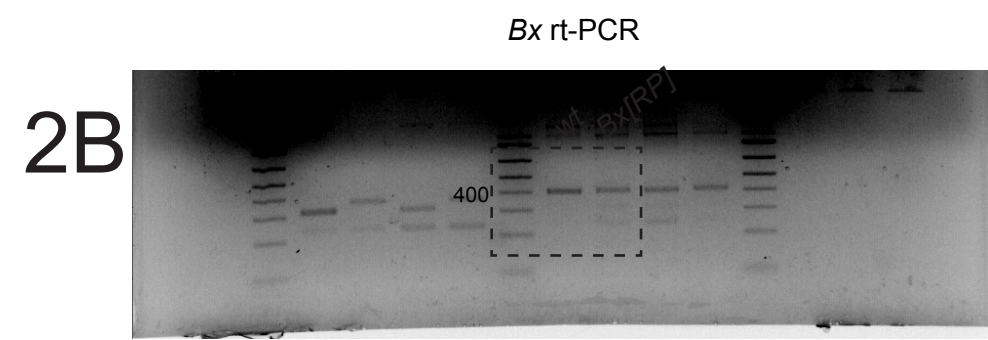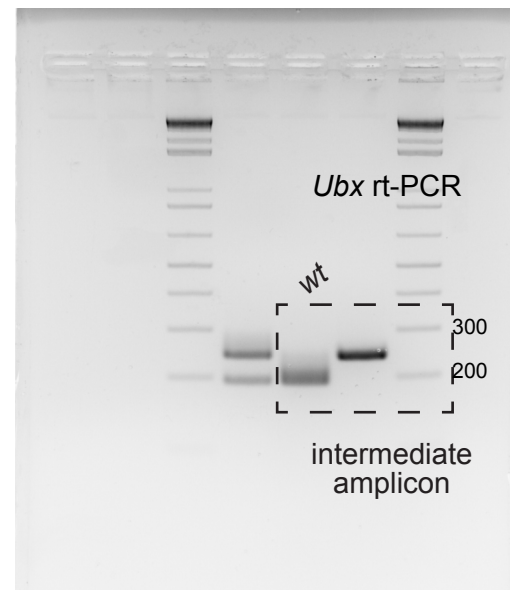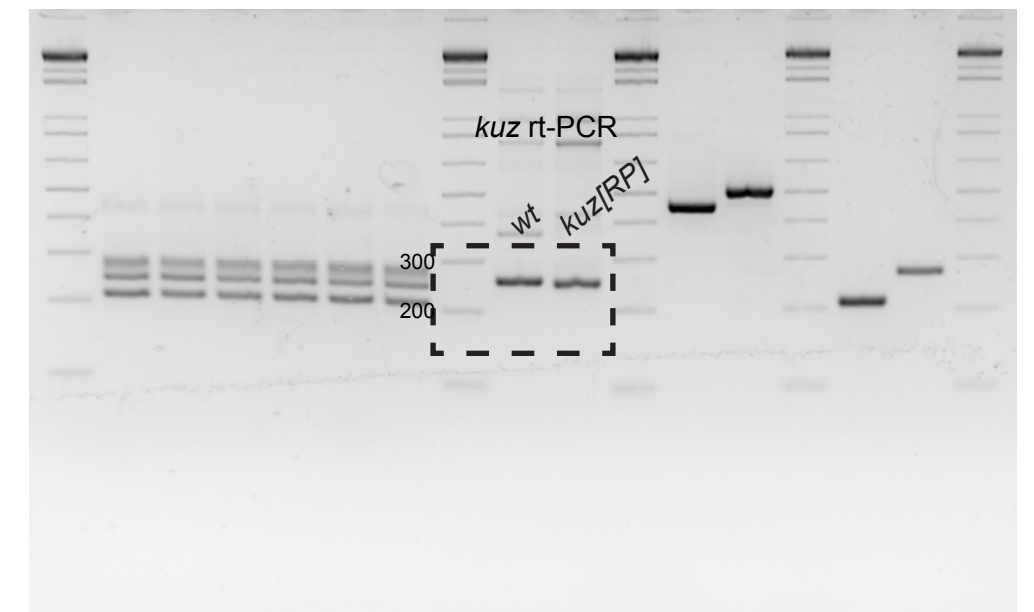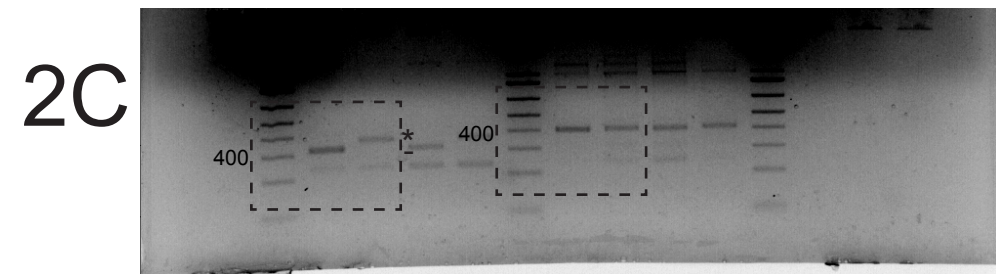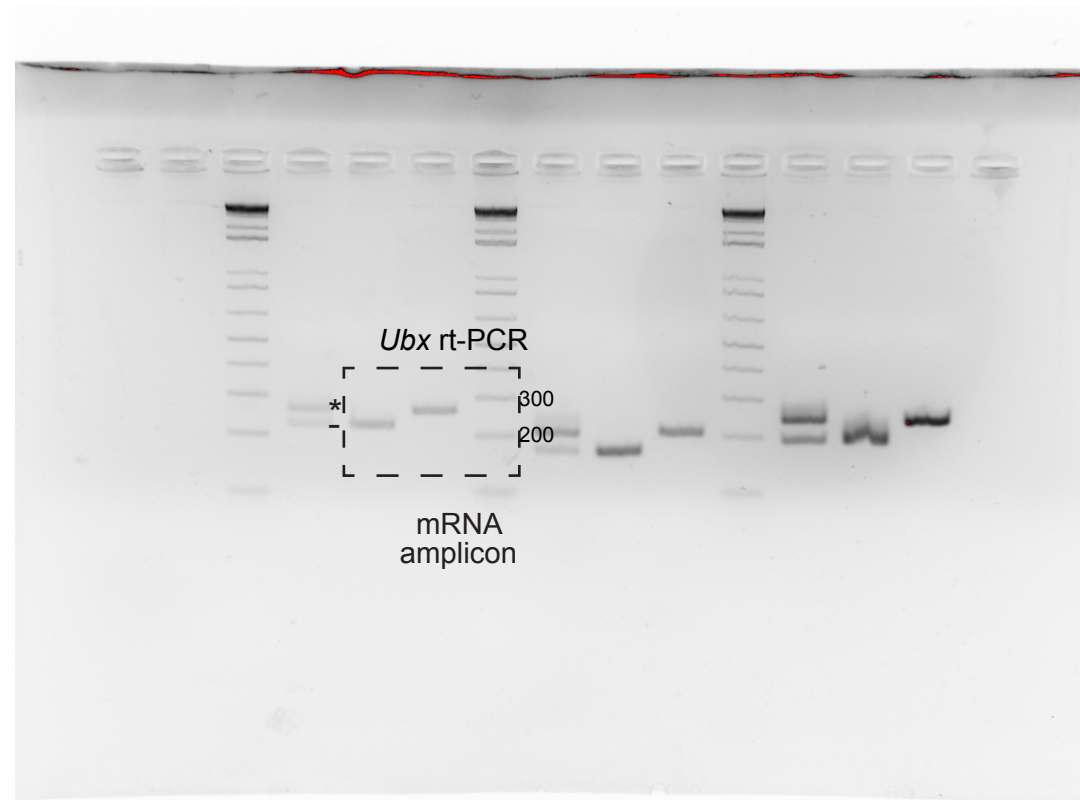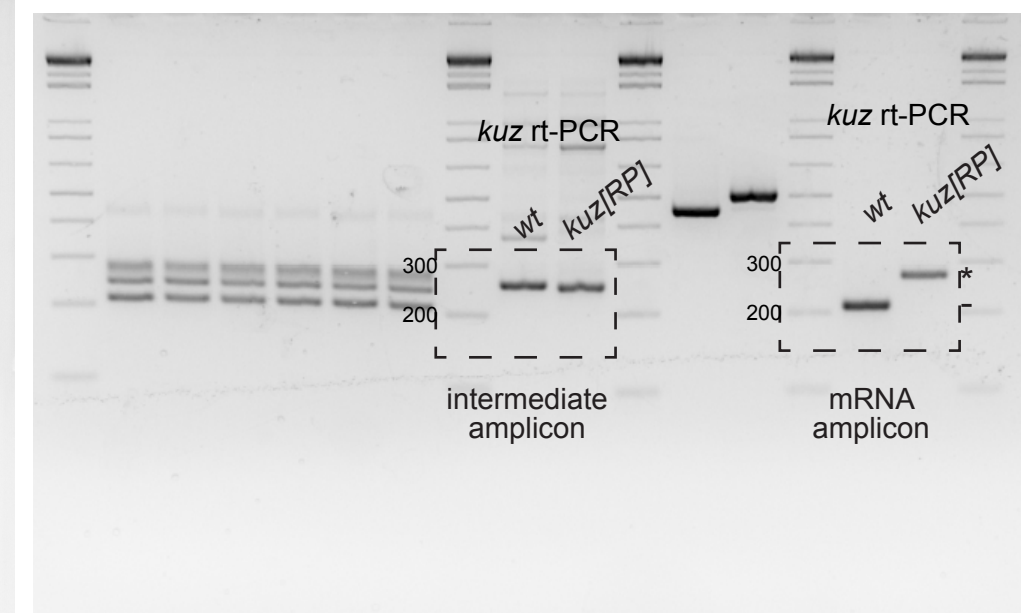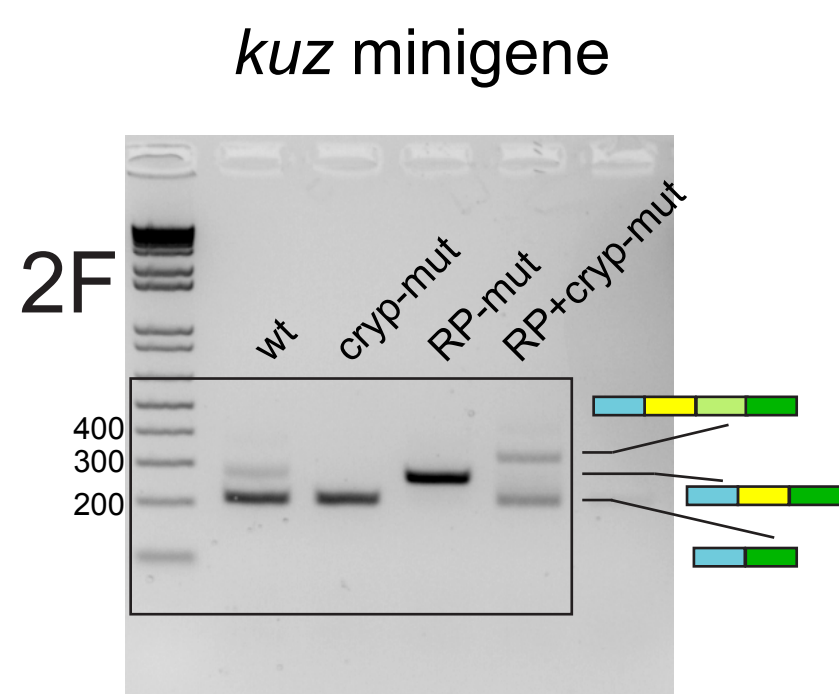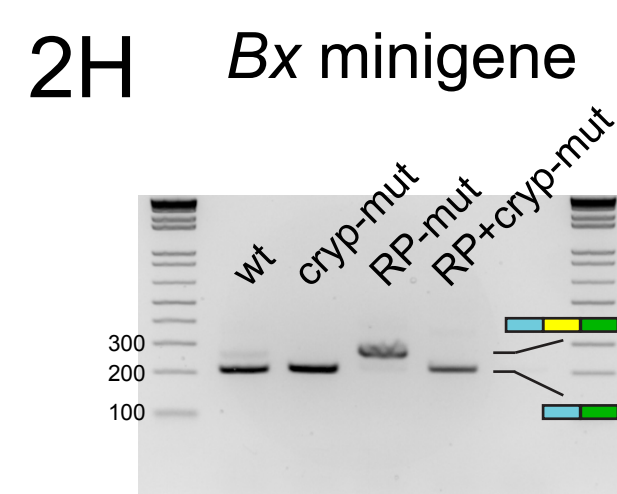

Data Set S1. Uncropped gels used in Figure 2.

Supplement: NIHMS1041148-supplement-Supplemental_Dataset_1.pdf [file NIHMS1041148-supplement-Supplemental_Dataset_1.pdf]
